1  
2  
3  
4  
5  
6  
7  
8  
9  
10  
11  
12  
13  
14  
15  
16  
17  
18  
19  
20  
21  
22  
23  
24  
25  
26  
27  
28  
29  
30  
31  
32  
33

## **A dendritic-like microtubule network is organized from swellings of the basal fiber in neural progenitors**

L. Coquand\*<sup>1</sup>, G.S. Victoria\*<sup>1</sup>, A. Tata<sup>1</sup>, J.B. Brault<sup>1</sup>, F. Guimiot<sup>2</sup>, V. Fraissier<sup>3</sup>, A. D. Baffet<sup>1,4#</sup>

1- Institut Curie, PSL Research University, CNRS UMR144, Paris, France

2- UF de Fœtopathologie – Université de Paris et Inserm UMR1141, Hôpital Robert Debré, Paris, France

3- UMR 144-Cell and Tissue Imaging Facility (PICT-IBiSA), CNRS-Institut Curie, Paris, France.

4- Institut national de la santé et de la recherche médicale (Inserm)

\*These authors contributed equally

# Corresponding author: [alexandre.baffet@curie.fr](mailto:alexandre.baffet@curie.fr)

### **Abstract**

Neurons of the neocortex are generated by neural progenitors called radial glial cells. These polarized cells extend a short apical process towards the ventricular surface and a long basal fiber that acts as a scaffold for neuronal migration. How the microtubule cytoskeleton is organized in these cells to support long-range transport is unknown. Using subcellular live imaging within brain tissue, we show that microtubules in the apical process uniformly emanate from the pericentrosomal region, while microtubules in the basal fiber display a mixed polarity, reminiscent of the mammalian dendrite. We identify acentrosomal microtubule organizing centers localized in swellings of the basal fiber. We characterize their distribution and demonstrate that they accumulate the minus end stabilizing factor CAMSAP3 and TGN-related membranes, from which the majority of microtubules grow. Finally, using live imaging of human fetal cortex, we show that this organization is conserved in basal radial glial (bRG) cells, a highly abundant progenitor cell population associated with human brain size expansion.

## 34 **Introduction**

35           In the developing neocortex, neurons and glial cells are generated by neuronal  
36 progenitors called Radial Glial (RG) cells (Kriegstein and Alvarez-Buylla, 2009; Taverna et  
37 al., 2014). Two types of closely-related RG cells have been identified, with different  
38 localization, morphologies and abundancy. Apical radial glial (aRG) cells, also known as vRGs,  
39 are neuroepithelial cells present in all mammalian species. They are highly elongated bipolar  
40 cells, with an apical process attached to the ventricular surface, and a basal process (or fiber)  
41 extending towards the pial surface of the brain (Paridaen and Huttner, 2014) (Fig. 1A). Basal  
42 radial glial (bRG) cells, also known as oRGs, are rare in lissencephalic (smooth brain) species  
43 such as mice, and abundant in gyrencephalic (folded brain) species, including humans (Lui et  
44 al., 2011; Hansen et al., 2010; Fietz et al., 2010; Reillo et al., 2011). Their relative abundance  
45 is believed to account for variations in the size and degree of folding of the neocortex  
46 (Fernández et al., 2016). bRG cells derive from aRG but have delaminated from the  
47 neuroepithelium and retracted their apical process (Fig. 1A). aRG and bRG cells however share  
48 many characteristics, including a close transcriptional profile and an elongated basal process  
49 (Pollen et al., 2015; Hansen et al., 2010).

50           The basal process of RG cells has long been known to act as a scaffold, guiding the  
51 migration of newborn neurons to their correct position in the neocortex (Noctor et al., 2004;  
52 Tan and Shi, 2013). More recently, the basal process has emerged as a potential regulator of  
53 cell fate (Shitamukai et al., 2011; Alexandre et al., 2010). Accordingly, a number of molecules  
54 important for basal process integrity or for RG cell proliferative capacity have been identified  
55 to localize in a polarized manner to the basal process (Yokota et al., 2009; 2010; Tsunekawa et  
56 al., 2012). A recent study identified multiple mRNAs localizing to the basal endfeet, and  
57 demonstrated their local translation (Pilaz et al., 2016). These mRNAs, bound to the RNA-  
58 binding protein Fmr1p, were shown to travel long distances within the basal process, at  
59 velocities consistent with microtubule-based transport.

60           Organization of the microtubule cytoskeleton is crucial for polarized transport of  
61 cargoes to various subcellular locations. While the centrosome is the main microtubule  
62 organizing center (MTOC) during mitosis, many differentiated cells - including neurons,  
63 myotubes or epithelial cells - display an acentrosomal microtubule organization during  
64 interphase (Bartolini and Gundersen, 2006). In neurons, the axonal microtubule network is  
65 unipolar with the plus ends pointing towards the axonal tip, while in dendrites, microtubules  
66 have a mixed polarity, with various amounts of “minus end out” microtubules, depending on  
67 the neuronal type and species (Yau et al., 2016; Baas et al., 1988). This particular microtubule



68 organization depends on  $\gamma$ -tubulin-mediated acentrosomal nucleation, as well as on  
69 CAMSAP/Patronin-mediated minus end growth (Ori-McKenney et al., 2012; Wang et al.,  
70 2019; Feng et al., 2019; Pongrakhananon et al., 2018; Yau et al., 2014; Marcette et al., 2014;  
71 Chuang et al., 2014).

72 A variety of genetic mutations have been shown to lead to malformations of cortical  
73 development (MCDs), such as microcephaly and lissencephaly (Pinson et al., 2019). Strikingly,  
74 the majority of affected genes code for proteins associated with the microtubule cytoskeleton  
75 (Poirier et al., 2013; Jayaraman et al., 2018; Reiner et al., 1993). Few regulators of microtubule  
76 organization have been investigated so far in RG cells. The adaptor protein Memo1 controls  
77 the localization of CAMSAP2 and the stability and organization of the microtubule network in  
78 dissociated mouse RG cell cultures (Nakagawa et al., 2019). In the apical process, the  
79 centrosomal protein AKNA promotes microtubule nucleation and regulates aRG cell  
80 delamination (Camargo Ortega et al., 2019). The organization and polarity of the microtubule  
81 network in aRG and bRG cells *in situ* is however currently unknown. This is largely due to the  
82 challenge of studying dynamic subcellular processes in real time within thick organotypic brain  
83 cultures.

84 Here, using an approach for subcellular live imaging within cerebral tissue, we  
85 characterize microtubule organization in mouse aRG and human bRG cells *in situ*, within the  
86 native architecture of the cortex. We determine that, while microtubule polarity in the apical  
87 process of mouse aRG cells is unipolar, the basal process displays a mixed microtubule polarity,  
88 reminiscent of dendritic arbors in vertebrate neurons. We further identify acentrosomal  
89 microtubule organizing centers localized in swellings of the basal process and, using live  
90 imaging of human fetal brain slices, demonstrate that this organization is a conserved feature  
91 of human bRG cells.

92

## 93 **Results**

### 94 **A bipolar microtubule network in the basal process of aRG cells**

95 To visualize the orientation of growing microtubules in mouse aRG cells *in situ*, we  
96 developed an approach for high resolution and fast subcellular live imaging within thick  
97 embryonic brain slices. GFP-tagged plus-end tracking protein (+TIP) EB3 was delivered to  
98 aRG cells using *in utero* electroporation at embryonic day 13.5 (E13.5) (Baffet et al., 2016).  
99 The embryos were then sacrificed 24h later, and brains were sliced and mounted for imaging  
100 using a modified sample preparation and imaging method (see methods) (Fig. 1B). We first  
101 revisited microtubule organization in the apical process of mouse aRG cells. This analysis

102 indicated that over 99% of microtubule plus ends emanated from the apical endfoot, where the  
103 centrosome is located, and grew in the basal direction towards the cell soma (Fig. 1C, 1F &  
104 Supplemental Movie 1). We then performed a similar analysis in the basal process of aRG cells.  
105 In contrast to what we observed in the apical process, growing microtubules adopted a mixed  
106 polarity, reminiscent of dendritic microtubule organization (Fig. 1D, 1E & Supplemental Movie  
107 2 and 3). This organization, however, remained biased towards basally-directed growth, as only  
108 15% of microtubules grew in the apical direction (Fig. 1F). Apically and basally-directed  
109 microtubules within the basal fiber grew at similar speeds, but slower than in the apical process  
110 (Fig. 1G). In the basal process, basally-directed microtubules grew for longer durations,  
111 suggesting higher stability (Fig. 1H). EB3 comets did not grow from the apical centrosome,  
112 which is located hundreds of  $\mu\text{m}$  away, but directly emanated from the basal process. Therefore,  
113 microtubules in the apical process of aRG cells emanate from the pericentrosomal region and  
114 form a unipolar network growing in the basal direction, while microtubules in the basal process  
115 appear largely acentrosomal, and have a bipolar orientation biased towards basal growth.

116

### 117 **Acentrosomal microtubules preferentially grow from swellings of the basal process**

118 We next asked whether acentrosomal microtubule organizing centers (aMTOCs) may  
119 exist within the basal process of aRG cells. From the observation of the EB3-GFP movies, we  
120 noted that a large number of newly appearing comets emanated from swellings of the basal  
121 process (Fig 1D). Swellings (also known as varicosities) are well-known but poorly-described  
122 deformations of RG cell basal processes, with no reported function (Noctor et al., 2001; Hansen  
123 et al., 2010; Hu et al., 2013). We could easily observe these structures following expression of  
124 soluble GFP or immuno-staining against the radial glial-specific protein Nestin, allowing  
125 visualization of the RG cell outline (Fig. 2A, 2B). To measure microtubule growth from these  
126 structures, we live imaged a large number of swellings as well as basal process shafts (non-  
127 deformed regions) in EB3-GFP-expressing cells, and quantified the rate of new EB3 comet  
128 formation in these two domains. This analysis revealed that the average rate of comet formation  
129 in swellings was 7,09 times higher than in the rest of the shaft (Fig. 2C, 2D & Supplemental  
130 Movie 4). Moreover, while 89,6% of comets emanating from the shaft grew in the basal  
131 direction, microtubules emanating from swellings appeared initially more randomly oriented,  
132 albeit still with a basal preference (65,7%) (Fig. 2E). This analysis therefore identifies swellings  
133 of the basal process of mouse aRG cells as acentrosomal microtubule organizing centers.

134

135 **Dendritic-like microtubules organization from swellings is a conserved feature of human**  
136 **bRG cells**

137 Because bRG cells share many characteristics with aRG cells, we next asked if bipolar  
138 microtubule organization from basal process swellings was also a feature of human bRG cells.  
139 We reasoned that this may be even more critical for these cells, which can be millimeters long  
140 in the human brain. To test this, we developed a protocol to electroporate and live image pieces  
141 of human fetal frontal cortex biopsies, obtained from second trimester medical pregnancy  
142 terminations (Fig. 3A, 3B & see Methods). We identified bRG cells based on their localization  
143 in the subventricular zone and morphology. Their identity was confirmed after performing  
144 immuno-staining against SOX2, a RG cell marker. We first confirmed the presence of  
145 numerous swellings all along the basal process of human bRG cells, which were visible  
146 following GFP electroporation or immuno-staining against Vimentin (Fig. 3C, 3D). We next  
147 expressed EB3-GFP in human fetal cortex samples and recorded plus end microtubule growth  
148 in bRG cell swellings. Similar to our observations in mouse aRG cells, we observed abundant  
149 *de novo* EB3 comet formation within swellings (Fig. 3E & Supplemental Movie 5). The rate of  
150 EB3 comet formation inside swellings was very similar in the two cell types (Fig. 3F). Finally,  
151 we analyzed the directionality of EB3 comets in the basal process of human bRG cells, which  
152 revealed, as for mouse aRG cells, a bipolar microtubule network biased towards basal growth  
153 ( $82,3 \pm 84,5 \%$ ) (Fig. 3G). Therefore, bipolar microtubule network organization from basal  
154 process swellings appears to be conserved between mouse aRG and human bRG neural stem  
155 cells.

156

157 **Size and distribution of basal process swellings**

158 While the role of basal process swellings remains unexplored, a description of their  
159 morphology and periodicity is also lacking. We first compared the size of swellings in mouse  
160 aRG and human fetal bRG cells. This analysis revealed relatively variable sizes, but on average  
161 similar between the two cell types (around  $8 \mu\text{m}^2$  for mouse aRG cells and  $9 \mu\text{m}^2$  for human  
162 bRG cells) (Fig. 3H). We next analyzed the distribution of swellings along the basal process by  
163 measuring the average swelling-to-swelling distance. While the distance between two  
164 consecutive swellings was quite variable, their frequency was substantially higher in human  
165 bRG cells than in mouse aRG cells (1 every  $7,7 \mu\text{m}$  vs 1 every  $21 \mu\text{m}$ , respectively) (Fig. 3I).  
166 The higher frequency of swellings in bRG cells may be due to their greater length, requiring  
167 more microtubule organizing centers far away from the centrosome. However, human swelling

168 distribution in early (gestational week 14) and late neurogenic stage - when the basal process is  
169 substantially longer (week 20) - remained constant (Fig 3I).

170

### 171 **Basal process microtubules grow from CAMSAP3-positive foci**

172 To identify how swellings may act as local acentrosomal MTOCs, we first investigated  
173 the localization of the key microtubule nucleator, the  $\gamma$ -tubulin ring complex ( $\gamma$ -TURC).  
174 Expression of mEmerald- $\gamma$ -Tubulin revealed its expected enrichment in the pericentrosomal  
175 region at the base of the apical process (Fig. 4A). However,  $\gamma$ -tubulin was undetectable within  
176 the basal process, both in swellings or in the rest of the shaft (Fig. 4A), suggesting an absence  
177 of  $\gamma$ -TURC-based nucleation away from the centrosome. We next tested whether growing  
178 microtubules preferentially emerged from basal process swellings due to an accumulation of  
179 stabilized microtubule minus ends within these structures. CAMSAP3 specifically recognizes  
180 and stabilizes microtubule minus ends, generating seeds from which multiple rounds of plus  
181 end growth and shrinkage can occur (Jiang et al., 2014). Upon electroporation, GFP-CAMSAP3  
182 accumulated not only at the ventricular surface but, unlike  $\gamma$ -tubulin, also localized as patches  
183 along the basal process of aRG cells (Fig. 4B, 4C). CAMSAP3 could be observed inside as well  
184 as outside swellings, consistent with EB3 comets appearing in both locations (Fig. 4C).  
185 However, the higher frequency of EB3 growth from swellings was reflected by the very high  
186 percentage of swellings containing CAMSAP3 clusters ( $85,1 \pm 8,4 \%$ ) (Fig. 4D). Moreover,  
187 CAMSAP3 clusters were much larger within swellings than in the shaft (Fig. 4C).

188 We then live imaged GFP-CAMSAP3 together with EB3-mCherry, within embryonic  
189 brain slices. In contrast to the highly dynamic EB3 comets, CAMSAP3 foci remained relatively  
190 immobile, as expected for stabilized microtubule minus ends. The majority of newly formed  
191 EB3-mCherry comets were observed emanating from CAMSAP3-GFP clusters ( $74.4 \pm 13.2\%$ )  
192 (Fig. 4C, 4E & Supplemental Movie 6). This was the case within swellings, but also in the shaft  
193 where the less frequent formation of novel EB3 comets still strongly correlated with CAMSAP3  
194 foci. These results suggest that microtubules preferentially grow from stabilized minus ends  
195 concentrated within swellings of the basal process.

196

### 197 **A TGN-related compartment localizes to microtubule minus ends in basal process** 198 **swellings**

199 Because the Golgi apparatus is a major site for microtubule organization, we next asked  
200 whether Golgi outposts could be found along the basal process of aRG cells, similarly to what

201 happens in neurons (Ori-McKenney et al., 2012). To test this, we *in utero* electroporated the  
202 cerebral cortex of mouse embryos with constructs expressing different tagged Golgi markers  
203 along with a cytoplasmic fluorescent protein to visualize basal process outline. In the apical  
204 process, where the Golgi apparatus is localized, we consistently detected the *cis-medial* marker  
205 ManII, the *trans* marker GalNacT2, as well as the small GTPase Rab6A (Fig. 5A). Strikingly,  
206 the *trans* and Trans Golgi Network (TGN) markers Rab6A, GalNacT2, GalT and TGN46 also  
207 localized within the basal process and accumulated within the vast majority of swellings ( $87,8$   
208  $\pm 5,1\%$  for GalNacT2) (Fig. 5B, 5E). The *cis-medial* markers ManII and GMAP210 were,  
209 however, undetectable outside the apical process (Fig. 5B). These results point towards the  
210 presence of a Golgi-related secretory compartment with a *trans*-Golgi/TGN identity in basal  
211 process swellings of RG cells.

212 CAMSAP2 was previously shown to be specifically recruited to the *cis*-Golgi (Wu et  
213 al., 2016). Consistently, we noted that its homologue CAMSAP3 did not colocalize with the  
214 *trans* marker GalNacT2 in basal process swellings (Fig. 5C). However, we noted that  
215 CAMSAP3 and GalNacT2 were frequently found in close proximity (Fig. 5C). Because the  
216 *trans* and TGN can stimulate microtubule growth, via the recruitment of CLASP 1 and 2  
217 (Efimov et al., 2007), we asked whether microtubules preferentially grew from GalNacT2-  
218 positive foci. We therefore live imaged GalNacT2 together with EB3, and quantified the  
219 amount of newly formed EB3 comets emanating for GalNacT2-positive clusters. In agreement  
220 with the CAMSAP3-GalNacT2 apposition, this analysis revealed a strong association between  
221 GalNacT2-positive structures and newly formed EB3 comets ( $72 \pm 6.8\%$ ) (Fig. 5D, 5F &  
222 Supplemental Movie 7). These results point towards a potential role for Golgi membranes in  
223 the growth of minus end-stabilized microtubules, within swellings of RG cell basal processes.

224

## 225 DISCUSSION

226 In this report, we characterize the microtubule network organization in radial glial cells,  
227 the neural stem cells of the developing mammalian neocortex. We show that microtubules of  
228 the basal process are acentrosomal and originate predominantly from swellings where we find  
229 Golgi-related membranes as well as the minus end stabilizing factor CAMSAP3 to accumulate.  
230 Moreover, we demonstrate that this organization is conserved from mouse aRG cells to human  
231 bRG cells. Unlike for neurons, which still polarize when cultivated *in vitro*, analysis of RG cells  
232 can only be performed within the tissue. Indeed, RG cells cultivated *in vitro* lose their apico-

233 basal polarity and do not generate any swelling. Our study was therefore entirely performed *in*  
234 *situ*, within thick embryonic brain slices.

235 The basal process organization is reminiscent of what has been described in the  
236 mammalian dendrite, where one third of dynamic microtubules are “minus end out”, growing  
237 towards the soma (Baas et al., 1988; Yau et al., 2016). This polarity suggests that trafficking  
238 into the basal process is likely to rely on kinesin-based movement, but that minus end-based  
239 transport of specific cargos – as shown in dendrites (Kapitein et al., 2010) – cannot be ruled  
240 out. It is important to stress that EB3-tracking allows to measure the polarity of the dynamic  
241 microtubule network, and is only an approximation for the overall microtubule polarity. Indeed,  
242 laser-cut and motor-PAINT experiments performed in hippocampal neurons in culture have  
243 revealed an even greater proportion of “minus end out” microtubules (Yau et al., 2016; Tas et  
244 al., 2017). The identification of microtubule organizing centers throughout the basal process is  
245 consistent with microtubules growing both apically and basally, but how the polarity of the  
246 network is biased towards basal growth remains unclear. In axons, unipolar microtubule  
247 organization depends on the HAUS/augmin complex (Cunha-Ferreira et al., 2018; Sánchez-  
248 Huertas et al., 2016). This complex was recently shown to be critical for  $\gamma$ -tubulin-mediated  
249 nucleation from presynaptic boutons (Qu et al., 2019), where increased microtubule dynamics  
250 favors delivery of synaptic vesicle precursors (Guedes-Dias et al., 2019).

251 Based on the absence of  $\gamma$ -tubulin, swellings do not appear to be sites of microtubule  
252 nucleation, but rather sites of minus end stabilization. Although we cannot rule out the presence  
253 of undetectable amounts of  $\gamma$ -tubulin in swellings, the localization of the minus end capping-  
254 protein CAMSAP3 further supports this notion. If microtubules are not nucleated within the  
255 basal process, where could stabilized seeds come from? One possibility is that acentrosomal  
256 microtubules are generated in the apical process by severing enzymes such as spastin or katanin.  
257 Alternatively, such severing could occur directly within the basal process, in order to amplify  
258 the number of acentrosomal microtubules. Interestingly, human mutations in *KATN1*, which  
259 encodes the p80 subunit of katanin, cause severe microcephaly and lissencephaly (Hu et al.,  
260 2014). While mitotic and ciliary defects were reported in mutant RG cells, the role of katanin  
261 in interphasic microtubule organization was not addressed.

262 We observed the presence of *trans* and TGN markers, but not *cis-medial* elements, in  
263 swellings of the basal process. This argues against the presence of canonical Golgi outposts,  
264 and rather points to a secretory structure, presumably with a TGN identity. The TGN is known  
265 to locally stimulate microtubule growth via recruitment of the CLASPs plus end binding  
266 proteins (Efimov et al., 2007). The presence of glycosylating enzymes (i.e. GalT) is surprising



267 and may reflect leakage from the apical Golgi apparatus. Nevertheless, our observations are  
268 consistent with an electron microscopy study revealing a lack of Golgi cisternae in the basal  
269 process of aRG cells (Taverna et al., 2016). Our data therefore argue against Golgi-mediated  
270 nucleation, but suggest a potential role for TGN membranes in microtubule plus end growth.  
271 Together, this work identifies the organization of the microtubule cytoskeleton in mouse and  
272 human RG cells, and will allow to determine how genetic mutations targeting microtubule  
273 regulators may affect these neural progenitor cells, leading to brain malformations.

274

## 275 **Materials and Methods**

276

### 277 **Ethics statement:**

278 For animal care, we followed the European and French National Regulation for the Protection  
279 of Vertebrate Animals used for Experimental and other Scientific Purposes (Directive 2010/63;  
280 French Decree 2013-118). The project was authorized and benefited from guidance of the  
281 Animal Welfare Body, Research Centre, Institut Curie. CD1-IGS pregnant females were  
282 purchased from Charles River Laboratories (France).

283 Human fetal tissue samples were collected with previous patient consent and in strict  
284 observance of legal and institutional ethical regulations. The protocol was approved by the  
285 French biomedical agency (Agence de la Biomédecine, approval number: PFS17-003).

286

### 287 ***In utero* electroporation of mouse embryonic cortex**

288 Pregnant CD1-IGS mice at embryonic day 13.5 (E13.5) were anesthetized with isoflurane gas,  
289 and injected subcutaneously first with buprenorphine (0.075mg/kg) and a local analgesic,  
290 bupivacaine (2 mg/kg), at the site of the incision. Lacrinorm gel was applied to the eyes to  
291 prevent dryness/irritation during the surgery. The abdomen was shaved and disinfected with  
292 ethanol and antibiotic swabs, then opened, and the uterine horns exposed. Plasmid DNA  
293 mixtures were used at a final concentration of 1  $\mu\text{g}/\mu\text{l}$  per plasmid, dyed with Fast Green and  
294 injected into the left lateral ventricle of several embryos. The embryos were then electroporated  
295 through the uterine walls with a NEPA21 Electroporator (Nepagene) and a platinum plated  
296 electrode (5 pulses of 50 V for 50 ms at 1 second intervals). The uterus was replaced and the  
297 abdomen sutured. The mother was allowed to recover from surgery and supplied with  
298 painkillers in drinking water post-surgery.

299

300



### 301 **Electroporation of human fetal cortex**

302 Fresh tissue from human fetal cortex was obtained from autopsies. A piece of pre-frontal cortex  
303 was collected from one hemisphere, and transported on ice to the lab. The tissue was divided  
304 into smaller pieces and embedded 4% low-gelling agarose (Sigma) dissolved in artificial  
305 cerebrospinal fluid (ACSF). Plasmid DNA ( $1 \mu\text{g}/\mu\text{l}$ ) was injected with a fine glass micropipette  
306 through the agarose at the ventricular surface. The gel block was then subjected to a series of 5  
307 pulses of 50 V for 50 ms at 1 second intervals and sliced with a Leica VT1200S vibratome (300  
308  $\mu\text{m}$ -thick slices) in ice-cold ACSF. Slices were grown on Millicell culture inserts (Merck) in  
309 cortical culture medium (DMEM-F12 containing B27, N2, 10 ng/ml FGF, 10 ng/ml EGF, 5%  
310 fetal bovine serum and 5% horse serum) for up to 5 days. Medium was changed every day.

311

### 312 **Subcellular live imaging in mouse embryonic brain and human fetal cortex slices**

313 To record EB3-GFP or EB3-mCherry dynamics together with Golgi markers or CAMSAP3-  
314 GFP in radial glia *in situ*, we used the following approach. 24h after the electroporation, the  
315 pregnant mouse was sacrificed and the electroporated embryos recovered. Brains were  
316 dissected in ACSF and 300  $\mu\text{m}$ -thick coronal slices were prepared with a Leica VT1200S  
317 vibratome in ice-cold ACSF. The slices were cultured on membrane filters over enriched  
318 medium (DMEM-F12 containing B27, N2, 10 ng/ml FGF, 10 ng/ml EGF, 5% fetal bovine  
319 serum and 5% horse serum). After recovery in an incubator at 37°C, 5% CO<sub>2</sub> for 2 hours (or  
320 24H for human tissue), the filters were cut and carefully turned over on a 35 mm FluoroDish  
321 (WPI), in order to position the sample in direct contact with the glass, underneath the filter  
322 (which maintained the sample flat). Live imaging was performed on a spinning disk wide  
323 microscope equipped with a Yokogawa CSU-W1 scanner unit to increase the field of view and  
324 improve the resolution deep in the sample. The microscope was equipped with a high working  
325 distance (WD 0.3 mm) 100X SR HP Plan Apo 1.35 NA Silicon immersion (Nikon), or a 60X  
326 1.27 NA Apo plan objective (Nikon), and a Prime95B SCMOS camera. Z-stacks of 20-30  $\mu\text{m}$   
327 range were taken with an interval of 1  $\mu\text{m}$ . Videos were mounted in Metamorph. Image analysis  
328 (Kymographs and other quantifications), modifications of brightness and contrast were carried  
329 out on Fiji. Figures were assembled in Affinity Designer.

330

### 331 **Immunostaining of brain slices**

332 Mouse embryonic brains were dissected out of the skull, fixed in 4% Pfa for 2 hours, and 80  
333  $\mu\text{m}$ -thick slices were prepared with a Leica VT1200S vibratome in PBS. Human fetal slices in  
334 culture were fixed in 4% Pfa for 2 hours. Slices were boiled in citrate sodium buffer (10mM,

335 pH6) for 20 minutes and cooled down at room temperature (antigen retrieval). Slices were then  
336 blocked in PBS-Triton X100 0.3%-Donkey serum 2% at room temperature for 2 hours,  
337 incubated with primary antibody overnight at 4°C in blocking solution, washed in PBS-Tween  
338 0.05%, and incubated with secondary antibody overnight at 4°C in blocking solution before  
339 final wash and mounting in aquapolyount. Mosaics (tilescans) of fixed human tissue were  
340 acquired with a 40X Apo-Plan objective.

341

### 342 **Expression constructs and antibodies**

343 The following plasmids were used in this study. CAMSAP3-GFP (a gift from Masatoshi  
344 Takeichi); EB3-GFP (a gift from Matthieu Piel); EB3-mCherry (Michael Davidson, Addgene  
345 55037); mCherry2-C1 empty vector (Michael Davidson, Addgene 54563); mEGFP-C1 empty  
346 vector (Michael Davidson, Addgene 54759); mEmerald- $\gamma$ -Tubulin (Michael Davidson,  
347 Addgene 54105); GFP-Rab6A (a gift from Bruno Goud); GFP-GMAP210 (a gift from Claire  
348 Hivroz); GalT-mCherry, GalNacT2-mCherry, ManII-GFP, TGN46-GFP (all gifts from Franck  
349 Perez). Antibodies used in this study were mouse anti-Nestin (BD Pharmingen 556309, 1/500)  
350 and rat anti-Vimentin (R&D systems MAB2105, 1/500).

351

### 352 **Acknowledgments**

353 We acknowledge the Cell and Tissue Imaging (PICT-IBiSA), Institut Curie, member of the  
354 French National Research Infrastructure France-BioImaging (ANR10-INBS-04) and the Nikon  
355 BioImaging Center (Institut Curie, France). We thank F. Perez, Matthieu Piel, Claire Hivroz,  
356 Bruno Goud (I. Curie) and Masatoshi Takeichi (Riken) for reagents and advice. We thank  
357 Renata Basto, Franck Perez and Bruno Goud (I. Curie) for helpful discussions and critical  
358 reading of the manuscript. L.C. was funded by a PSL/Sorbonne Université fellowship, G.S.V.  
359 by I. Curie and the Ville de Paris, J.B.B. by PSL and the Ville de Paris. A.D.B. is an Inserm  
360 researcher. This work was supported by the CNRS, I. Curie, the Ville de Paris “Emergences”  
361 program, Labex CelTisPhyBio (11-LBX-0038) and PSL.

362

### 363 **Author contributions**

364 L.C., G.S.V. and A.D.B. conceived the project, analysed the data and wrote the manuscript.  
365 L.C. and G.S.V. did most of the experimental procedures. A.T. performed swelling  
366 characterization experiments. J.B.B and V.F. contributed with high resolution microscopy in  
367 the brain. F.G. provided human foetal sample. A.D.B. supervised the project.

368

## 369 **Figure Legends**

370

### 371 **Figure 1. A bipolar microtubule network in the basal process of aRG cells**

372 **A.** Schematic representation of apical radial glial (aRG) and basal radial glial (bRG) cells.  
373 These neural stem cells both generate neurons - via an intermediate progenitor (I.P.) - and  
374 support their migration, but bRG cells have lost their apical connection to the ventricular  
375 surface. As a convention, the basal side is represented upwards. **B.** Experimental set-up:  
376 Plasmids are injected into the left cortical ventricle of E13.5 embryos *in utero*. After 24h, the  
377 mother and embryos are sacrificed, embryonic cortices are recovered, sliced coronally and  
378 subjected to live imaging using high working distance objectives. **C.** (Left) Live imaging of  
379 EB3-GFP in the apical process of mouse aRG cells *in situ*. Scale bar = 5  $\mu\text{m}$ . (Center)  
380 Corresponding kymograph. Most comets originate from the apical endfoot and move basally.  
381 Scale bar = 2 min. (Right) Manual tracks corresponding to the kymograph. **D.** (Left) Live  
382 imaging of EB3-GFP in the basal process of mouse aRG cells *in situ*. Scale bar = 5  $\mu\text{m}$ . (Center)  
383 Corresponding kymograph. Comets display both apical and basal movement. Scale bar = 5 min.  
384 (Right) Manual tracks corresponding to the kymograph. **E.** Live imaging montage of EB3-GFP  
385 in the basal process of mouse aRG cell. Blue arrowheads indicate basally growing microtubules  
386 and orange arrowhead indicates apically growing microtubule. A swelling can be seen in the  
387 center. Scale bar = 5  $\mu\text{m}$ . **F.** Quantification of the average directionality of EB3 comets in the  
388 apical and basal processes (n = 302 and 827 comets, respectively). **G.** Quantification of the  
389 average speed of apically and basally directed EB3 comets in the basal process (n = 52 and 45  
390 comets, respectively). **H.** Quantification of the average growth duration of apically and basally  
391 directed EB3 comets in the basal process (n = 52 and 45 comets, respectively). **F, G, H,** error  
392 bars indicate SD. \*\*\*\*p<0,0001 by Mann-Whitney tests.

393

### 394 **Figure 2. Acentrosomal microtubules preferentially grow from swellings of the basal** 395 **process**

396 **A, B.** The basal processes of aRG cells display swellings along their length, which can be  
397 visualized by overexpression of GFP (**A**, scale bar = 5  $\mu\text{m}$ ) as well as by immunofluorescence  
398 against Nestin, a RG cell-specific cytoskeletal marker (**B**, scale bar = 25  $\mu\text{m}$ . Inset, scale bar =  
399 5  $\mu\text{m}$ ). **C.** Live imaging of EB3-GFP in the basal process of an aRG cell showing the emergence  
400 of new comets within a swelling. Green arrowheads: newborn comets in the swelling. Purple  
401 arrowheads: newborn comets in the shaft. Scale bar = 5  $\mu\text{m}$ . **D.** Quantification of the rate of  
402 EB3 comet formation in basal process shafts and swellings, normalized to length (n=52 shafts

403 and 53 swellings). **E.** Quantification of the average directionality of EB3 comets in the shafts  
404 and swellings of the basal processes (n = 122 and 260 comets, respectively). **D, E,** error bars  
405 indicate SD. \*\*\*\*p<0,0001 by Mann-Whitney tests.

406

407 **Figure 3. Dendritic-like microtubules organization from swellings is a conserved feature**  
408 **of human bRG cells**

409 **A.** Schematic of protocol as described in Methods. Pieces of human foetal cortex were  
410 embedded in agarose prior to injection with DNA underneath the ventricular zone (VZ) and  
411 electroporation, followed by slicing and culture. **B.** A slice of human foetal cortex cultured for  
412 72 hours *in vitro* prior to fixation and staining with DAPI (blue). EB3-GFP-electroporated basal  
413 radial glia (green) occupy the subventricular zone (SVZ) and extend long basal processes. VZ:  
414 Ventricular Zone, CP: Cortical plate. Scale bar: 200  $\mu$ m. **C, D.** The basal processes of human  
415 bRG cells display swellings along their length, which can be visualized by overexpression of  
416 GFP (**C**, scale bar = 5  $\mu$ m) as well as by immunofluorescence against Vimentin, a RG cell-  
417 specific cytoskeletal marker (**D**, scale bar = 25  $\mu$ m. Inset, scale bar = 5  $\mu$ m). **E.** Live imaging  
418 of a human bRG cell showing appearance of *de novo* EB3 comets (arrowheads) in a basal  
419 process swelling. Scale bar: 5  $\mu$ m. **F.** Quantification of the rate of EB3 comet formation in basal  
420 process swellings of human bRG cells at gestational week (GW) 18. Mouse data from figure  
421 2D are shown for comparison. (n=12 human swellings and 53 mouse swellings) **G.**  
422 Quantification of the average directionality of EB3 comets in the basal process of human bRG  
423 cells (n = 205 comets). Mouse data from figure 1F are shown for comparison. **H.** Quantification  
424 of swelling size in mouse (E14.5) and human (GW 14 and 20) tissue (n=55, 129 and 772  
425 swellings respectively). **I.** Quantification of the distance between individual swellings along  
426 the basal process in mouse (E14.5) and human (GW 14 and 20) tissue (n=260 and 605 swellings  
427 respectively). In human tissue, swellings occur with greater frequency but are constant between  
428 early and late neurogenic stages. **F, G, H, I,** error bars indicate SD. \*\*\*\*p<0,0001 by Mann-  
429 Whitney tests.

430

431 **Figure 4. Basal process microtubules grow from CAMSAP3-positive foci**

432 **A, B.** mEmerald- $\gamma$ -tubulin and CAMSAP3-GFP localization in mouse aRG cell apical endfeet  
433 (scale bar = 5  $\mu$ m) and basal process swellings (scale bar = 2,5  $\mu$ m). Co-expression of mCherry  
434 allows to visualize RG cell outline. Both  $\gamma$ -tubulin and CAMSAP3 localize to the apical surface,  
435 but only CAMSAP3 localizes to basal process swellings. **C.** (Left) Live imaging of CAMSAP3-  
436 GFP and EB3-mCherry in mouse aRG cell basal process. EB3 comets emanate from

437 CAMSAP3-positive foci, which are concentrated within basal process swellings. Scale bar = 5  
438  $\mu\text{m}$ . (Right) Corresponding kymograph. Scale bar = 5 minutes. **D.** Quantification of the  
439 percentage of basal process swellings positive for CAMSAP3 (n=120 swellings). **E.**  
440 Quantification of the percentage of EB3 comets emanating from CAMSAP3-positive foci (n =  
441 345 comets). \*\*\*\*p<0,0001 by Mann-Whitney tests.

442

443 **Figure 5. A Golgi-related compartment localizes to microtubule minus ends in basal**  
444 **process swellings**

445 **A.** Expression of GalNacT2-mCherry, GFP-Rab6A and ManII-GFP in aRG cells highlighting  
446 localization of the Golgi apparatus in the apical process, next to the nucleus but away from the  
447 apical surface. scale bar = 5  $\mu\text{m}$  **B.** Expression of GalNacT2-mCherry, GalT-mCherry, GFP-  
448 RAB6, TGN46-GFP, GMAP210-GFP and ManII-GFP in aRG cells revealing localization of  
449 GalNacT2, GalT, RAB6, TGN46, and absence of GMAP210 and ManII, in basal process  
450 swellings. scale bar = 2,5  $\mu\text{m}$ . **A, B,** GFP or mCherry co-expression allows visualization of cell  
451 outline. **C.** Co-expression of GalNacT2-mCherry and GalT-mCherry with CAMSAP3-GFP  
452 reveals a close apposition along the basal process of mouse aRG cells. Scale bar = 2,5  $\mu\text{m}$ . **D.**  
453 (Left) Live imaging of EB3-GFP and GalNacT2-mCherry in mouse aRG cell basal process.  
454 EB3 comets emanate from GalNacT2-positive foci. Scale bar = 5  $\mu\text{m}$ . (Right) Corresponding  
455 kymograph. Scale bar = 5 minutes. **F.** Quantification of the percentage of basal process  
456 swellings positive for GalNacT2 (n = 70 swellings). **F.** Quantification of the percentage of EB3  
457 comets emanating from GalNacT2-positive foci (n = 333 comets). \*\*\*\*p<0,0001 by Mann-  
458 Whitney tests.

459

460 **References**

461

462 Alexandre, P., A.M. Reugels, D. Barker, E. Blanc, and J.D.W. Clarke. 2010. Neurons derive  
463 from the more apical daughter in asymmetric divisions in the zebrafish neural tube. *Nature*  
464 *Publishing Group*. 13:673–679. doi:10.1038/nn.2547.

465 Baas, P.W., J.S. Deitch, M.M. Black, and G.A. Banker. 1988. Polarity orientation of  
466 microtubules in hippocampal neurons: uniformity in the axon and nonuniformity in the  
467 dendrite. *Proc Natl Acad Sci USA*. 85:8335–8339. doi:10.1073/pnas.85.21.8335.

468 Baffet, A.D., A. Carabalona, T.J. Dantas, D.D. Doobin, D.J. Hu, and R.B. Vallee. 2016. Cellular  
469 and subcellular imaging of motor protein-based behavior in embryonic rat brain. *Methods*  
470 *Cell Biol*. 131:349–363. doi:10.1016/bs.mcb.2015.06.013.

- 471 Bartolini, F., and G.G. Gundersen. 2006. Generation of noncentrosomal microtubule arrays. *J*  
472 *Cell Sci.* 119:4155–4163. doi:10.1242/jcs.03227.
- 473 Camargo Ortega, G., S. Falk, P.A. Johansson, E. Peyre, L. Broix, S.K. Sahu, W. Hirst, T.  
474 Schlichthaerle, C. De Juan Romero, K. Draganova, S. Vinopal, K. Chinnappa, A.  
475 Gavranovic, T. Karakaya, T. Steininger, J. Merl-Pham, R. Feederle, W. Shao, S.-H. Shi,  
476 S.M. Hauck, R. Jungmann, F. Bradke, V. Borrell, A. Geerlof, S. Reber, V.K. Tiwari, W.B.  
477 Huttner, M. Wilsch-Bräuninger, L. Nguyen, and M. Götz. 2019. The centrosome protein  
478 AKNA regulates neurogenesis via microtubule organization. *Nature.* 567:113–117.  
479 doi:10.1038/s41586-019-0962-4.
- 480 Chuang, M., A. Goncharov, S. Wang, K. Oegema, Y. Jin, and A.D. Chisholm. 2014. The  
481 microtubule minus-end-binding protein patronin/PTRN-1 is required for axon regeneration  
482 in *C. elegans*. *CellReports.* 9:874–883. doi:10.1016/j.celrep.2014.09.054.
- 483 Cunha-Ferreira, I., A. Chazeau, R.R. Buijs, R. Stucchi, L. Will, X. Pan, Y. Adolfs, C. van der  
484 Meer, J.C. Wolthuis, O.I. Kahn, P. Schätzle, M. Altelaar, R.J. Pasterkamp, L.C. Kapitein,  
485 and C.C. Hoogenraad. 2018. The HAUS Complex Is a Key Regulator of Non-centrosomal  
486 Microtubule Organization during Neuronal Development. *CellReports.* 24:791–800.  
487 doi:10.1016/j.celrep.2018.06.093.
- 488 Efimov, A., A. Kharitonov, N. Efimova, J. Loncarek, P.M. Miller, N. Andreyeva, P. Gleeson,  
489 N. Galjart, A.R.R. Maia, I.X. McLeod, J.R. Yates, H. Maiato, A. Khodjakov, A.S.  
490 Akhmanova, and I. Kaverina. 2007. Asymmetric CLASP-dependent nucleation of  
491 noncentrosomal microtubules at the trans-Golgi network. *Dev Cell.* 12:917–930.  
492 doi:10.1016/j.devcel.2007.04.002.
- 493 Feng, C., P. Thyagarajan, M. Shorey, D.Y. Seebold, A.T. Weiner, R.M. Albertson, K.S. Rao,  
494 A. Sagasti, D.J. Goetschius, and M.M. Rolls. 2019. Patronin-mediated minus end growth  
495 is required for dendritic microtubule polarity. *J Cell Biol.* jcb.201810155–20.  
496 doi:10.1083/jcb.201810155.
- 497 Fernández, V., C. Llinares-Benadero, and V. Borrell. 2016. Cerebral cortex expansion and  
498 folding: what have we learned? *EMBO J.* doi:10.15252/embj.201593701.
- 499 Fietz, S.A., I. Kelava, J. Vogt, M. Wilsch-Bräuninger, D. Stenzel, J.L. Fish, D. Corbeil, A.  
500 Riehn, W. Distler, R. Nitsch, and W.B. Huttner. 2010. OSVZ progenitors of human and  
501 ferret neocortex are epithelial-like and expand by integrin signaling. *Nat Neurosci.* 13:690–  
502 699. doi:10.1038/nn.2553.
- 503 Guedes-Dias, P., J.J. Nirschl, N. Abreu, M.K. Tokito, C. Janke, M.M. Magiera, and E.L.F.  
504 Holzbaur. 2019. Kinesin-3 Responds to Local Microtubule Dynamics to Target Synaptic  
505 Cargo Delivery to the Presynapse. *Curr Biol.* 29:268–282.e8.  
506 doi:10.1016/j.cub.2018.11.065.
- 507 Hansen, D.V., J.H. Lui, P.R.L. Parker, and A.R. Kriegstein. 2010. Neurogenic radial glia in the  
508 outer subventricular zone of human neocortex. *Nature.* 464:554–561.  
509 doi:10.1038/nature08845.



- 510 Hu, D.J.-K., A.D. Baffet, T. Nayak, A.S. Akhmanova, V. Doye, and R.B. Vallee. 2013. Dynein  
511 recruitment to nuclear pores activates apical nuclear migration and mitotic entry in brain  
512 progenitor cells. *Cell*. 154:1300–1313. doi:10.1016/j.cell.2013.08.024.
- 513 Hu, W.F., O. Pomp, T. Ben-Omran, A. Kodani, K. Henke, G.H. Mochida, T.W. Yu, M.B.  
514 Woodworth, C. Bonnard, G.S. Raj, T.T. Tan, H. Hamamy, A. Masri, M. Shboul, M. Al  
515 Saffar, J.N. Partlow, M. Al-Dosari, A. Alazami, M. Alowain, F.S. Alkuraya, J.F. Reiter,  
516 M.P. Harris, B. Reversade, and C.A. Walsh. 2014. Katanin p80 regulates human cortical  
517 development by limiting centriole and cilia number. *Neuron*. 84:1240–1257.  
518 doi:10.1016/j.neuron.2014.12.017.
- 519 Jayaraman, D., B.-I. Bae, and C.A. Walsh. 2018. The Genetics of Primary Microcephaly. *Annu*  
520 *Rev Genomics Hum Genet*. 19:177–200. doi:10.1146/annurev-genom-083117-021441.
- 521 Jiang, K., S. Hua, R. Mohan, I. Grigoriev, K.W. Yau, Q. Liu, E.A. Katrukha, A.F.M. Altelaar,  
522 A.J.R. Heck, C.C. Hoogenraad, and A.S. Akhmanova. 2014. Microtubule Minus-End  
523 Stabilization by Polymerization-Driven CAMSAP Deposition. *Dev Cell*. 28:295–309.  
524 doi:10.1016/j.devcel.2014.01.001.
- 525 Kapitein, L.C., M.A. Schlager, M. Kuijpers, P.S. Wulf, M. van Spronsen, F.C. MacKintosh,  
526 and C.C. Hoogenraad. 2010. Mixed microtubules steer dynein-driven cargo transport into  
527 dendrites. *Curr Biol*. 20:290–299. doi:10.1016/j.cub.2009.12.052.
- 528 Kriegstein, A.R., and A. Alvarez-Buylla. 2009. The glial nature of embryonic and adult neural  
529 stem cells. *Annu. Rev. Neurosci*. 32:149–184. doi:10.1146/annurev.neuro.051508.135600.
- 530 Lui, J.H., D.V. Hansen, and A.R. Kriegstein. 2011. Development and evolution of the human  
531 neocortex. *Cell*. 146:18–36. doi:10.1016/j.cell.2011.06.030.
- 532 Marcette, J.D., J.J. Chen, and M.L. Nonet. 2014. The *Caenorhabditis elegans* microtubule  
533 minus-end binding homolog PTRN-1 stabilizes synapses and neurites. *Elife*. 3:e01637.  
534 doi:10.7554/eLife.01637.
- 535 Nakagawa, N., C. Plestant, K. Yabuno-Nakagawa, J. Li, J. Lee, C.-W. Huang, A. Lee, O. Krupa,  
536 A. Adhikari, S. Thompson, T. Rhynes, V. Arevalo, J.L. Stein, Z. Molnár, A. Badache, and  
537 E.S. Anton. 2019. Memo1-Mediated Tiling of Radial Glial Cells Facilitates Cerebral  
538 Cortical Development. *Neuron*. 103:836–852.e5. doi:10.1016/j.neuron.2019.05.049.
- 539 Noctor, S.C., A.C. Flint, T.A. Weissman, R.S. Dammerman, and A.R. Kriegstein. 2001.  
540 Neurons derived from radial glial cells establish radial units in neocortex. *Nature*. 409:714–  
541 720. doi:10.1038/35055553.
- 542 Noctor, S.C., V. Martínez-Cerdeño, L. Ivic, and A.R. Kriegstein. 2004. Cortical neurons arise  
543 in symmetric and asymmetric division zones and migrate through specific phases. *Nat*  
544 *Neurosci*. 7:136–144. doi:10.1038/nn1172.
- 545 Ori-McKenney, K.M., L.Y. Jan, and Y.-N. Jan. 2012. Golgi outposts shape dendrite  
546 morphology by functioning as sites of acentrosomal microtubule nucleation in neurons.  
547 *Neuron*. 76:921–930. doi:10.1016/j.neuron.2012.10.008.
- 548 Paridaen, J.T., and W.B. Huttner. 2014. Neurogenesis during development of the vertebrate  
549 central nervous system. *EMBO Rep*. 15:351–364. doi:10.1002/embr.201438447.



- 550 Pilaz, L.-J., A.L. Lennox, J.P. Rouanet, and D.L. Silver. 2016. Dynamic mRNA Transport and  
551 Local Translation in Radial Glial Progenitors of the Developing Brain. *Curr Biol.* 26:3383–  
552 3392. doi:10.1016/j.cub.2016.10.040.
- 553 Pinson, A., T. Namba, and W.B. Huttner. 2019. Malformations of Human Neocortex in  
554 Development - Their Progenitor Cell Basis and Experimental Model Systems. *Front Cell*  
555 *Neurosci.* 13:305. doi:10.3389/fncel.2019.00305.
- 556 Poirier, K., N. Lebrun, L. Broix, G. Tian, Y. Saillour, C. Boscheron, E. Parrini, S. Valence,  
557 B.S. Pierre, M. Oger, D. Lacombe, D. Geneviève, E. Fontana, F. Darra, C. Cances, M.  
558 Barth, D. Bonneau, B.D. Bernadina, S. N'Guyen, C. Gitiaux, P. Parent, V. des Portes, J.M.  
559 Pedespan, V. Legrez, L. Castelnau-Ptakine, P. Nitschke, T. Hieu, C. Masson, D. Zelenika,  
560 A. Andrieux, F. Francis, R. Guerrini, N.J. Cowan, N. Bahi-Buisson, and J. Chelly. 2013.  
561 Mutations in TUBG1, DYNC1H1, KIF5C and KIF2A cause malformations of cortical  
562 development and microcephaly. *Nat Genet.* 45:639–647. doi:10.1038/ng.2613.
- 563 Pollen, A.A., T.J. Nowakowski, J. Chen, H. Retallack, C. Sandoval-Espinosa, C.R. Nicholas,  
564 J. Shuga, S.J. Liu, M.C. Oldham, A. Diaz, D.A. Lim, A.A. Leyrat, J.A. West, and A.R.  
565 Kriegstein. 2015. Molecular identity of human outer radial glia during cortical  
566 development. *Cell.* 163:55–67. doi:10.1016/j.cell.2015.09.004.
- 567 Pongrakhananon, V., H. Saito, S. Hiver, T. Abe, G. Shioi, W. Meng, and M. Takeichi. 2018.  
568 CAMSAP3 maintains neuronal polarity through regulation of microtubule stability. *Proc*  
569 *Natl Acad Sci USA.* 115:9750–9755. doi:10.1073/pnas.1803875115.
- 570 Qu, X., A. Kumar, H. Blockus, C. Waites, and F. Bartolini. 2019. Activity-Dependent  
571 Nucleation of Dynamic Microtubules at Presynaptic Boutons Controls Neurotransmission.  
572 *Curr Biol.* 29:4231–4240.e5. doi:10.1016/j.cub.2019.10.049.
- 573 Reillo, I., C. De Juan Romero, M.Á. García-Cabezas, and V. Borrell. 2011. A role for  
574 intermediate radial glia in the tangential expansion of the mammalian cerebral cortex.  
575 *Cerebral Cortex.* 21:1674–1694. doi:10.1093/cercor/bhq238.
- 576 Reiner, O., R. Carrozzo, Y. Shen, M. Wehnert, F. Faustinella, W.B. Dobyns, C.T. Caskey, and  
577 D.H. Ledbetter. 1993. Isolation of a Miller-Dieker lissencephaly gene containing G protein  
578 beta-subunit-like repeats. *Nature.* 364:717–721. doi:10.1038/364717a0.
- 579 Sánchez-Huertas, C., F. Freixo, R. Viais, C. Lacasa, E. Soriano, and J. Lüders. 2016. Non-  
580 centrosomal nucleation mediated by augmin organizes microtubules in post-mitotic  
581 neurons and controls axonal microtubule polarity. *Nature Communications.* 7:12187–14.  
582 doi:10.1038/ncomms12187.
- 583 Shitamukai, A., D. Konno, and F. Matsuzaki. 2011. Oblique radial glial divisions in the  
584 developing mouse neocortex induce self-renewing progenitors outside the germinal zone  
585 that resemble primate outer subventricular zone progenitors. *Journal of Neuroscience.*  
586 31:3683–3695. doi:10.1523/JNEUROSCI.4773-10.2011.
- 587 Tan, X., and S.-H. Shi. 2013. Neocortical neurogenesis and neuronal migration. *Wiley*  
588 *Interdiscip Rev Dev Biol.* 2:443–459. doi:10.1002/wdev.88.

- 589 Tas, R.P., A. Chazeau, B.M.C. Cloin, M.L.A. Lambers, C.C. Hoogenraad, and L.C. Kapitein.  
590 2017. Differentiation between Oppositely Oriented Microtubules Controls Polarized  
591 Neuronal Transport. *Neuron*. 96:1264–1271.e5. doi:10.1016/j.neuron.2017.11.018.
- 592 Taverna, E., F. Mora-Bermúdez, P.J. Strzyz, M. Florio, J. Icha, C. Haffner, C. Norden, M.  
593 Wilsch-Bräuninger, and W.B. Huttner. 2016. Non-canonical features of the Golgi  
594 apparatus in bipolar epithelial neural stem cells. *Sci Rep*. 6:21206. doi:10.1038/srep21206.
- 595 Taverna, E., M. Götz, and W.B. Huttner. 2014. The cell biology of neurogenesis: toward an  
596 understanding of the development and evolution of the neocortex. *Annu Rev Cell Dev Biol*.  
597 30:465–502. doi:10.1146/annurev-cellbio-101011-155801.
- 598 Tsunekawa, Y., J.M. Britto, M. Takahashi, F. Polleux, S.-S. Tan, and N. Osumi. 2012. Cyclin  
599 D2 in the basal process of neural progenitors is linked to non-equivalent cell fates. *EMBO*  
600 *J*. 31:1879–1892. doi:10.1038/emboj.2012.43.
- 601 Wang, Y., M. Rui, Q. Tang, S. Bu, and F. Yu. 2019. Patronin governs minus-end-out orientation  
602 of dendritic microtubules to promote dendrite pruning in *Drosophila*. *Elife*. 8:711.  
603 doi:10.7554/eLife.39964.
- 604 Wu, J., C. de Heus, Q. Liu, B.P. Bouchet, I. Noordstra, K. Jiang, S. Hua, M. Martin, C. Yang,  
605 I. Grigoriev, E.A. Katrukha, A.F.M. Altelaar, C.C. Hoogenraad, R.Z. Qi, J. Klumperman,  
606 and A.S. Akhmanova. 2016. Molecular Pathway of Microtubule Organization at the Golgi  
607 Apparatus. *Dev Cell*. 39:44–60. doi:10.1016/j.devcel.2016.08.009.
- 608 Yau, K.W., P. Schätzle, E. Tortosa, S. Pagès, A. Holtmaat, L.C. Kapitein, and C.C.  
609 Hoogenraad. 2016. Dendrites In Vitro and In Vivo Contain Microtubules of Opposite  
610 Polarity and Axon Formation Correlates with Uniform Plus-End-Out Microtubule  
611 Orientation. *Journal of Neuroscience*. 36:1071–1085. doi:10.1523/JNEUROSCI.2430-  
612 15.2016.
- 613 Yau, K.W., S.F.B. van Beuningen, I. Cunha-Ferreira, B.M.C. Cloin, E.Y. van Battum, L. Will,  
614 P. Schätzle, R.P. Tas, J. van Krugten, E.A. Katrukha, K. Jiang, P.S. Wulf, M. Mikhaylova,  
615 M. Harterink, R.J. Pasterkamp, A.S. Akhmanova, L.C. Kapitein, and C.C. Hoogenraad.  
616 2014. Microtubule minus-end binding protein CAMSAP2 controls axon specification and  
617 dendrite development. *Neuron*. 82:1058–1073. doi:10.1016/j.neuron.2014.04.019.
- 618 Yokota, Y., T.-Y. Eom, A. Stanco, W.-Y. Kim, S. Rao, W.D. Snider, and E.S. Anton. 2010.  
619 Cdc42 and Gsk3 modulate the dynamics of radial glial growth, inter-radial glial interactions  
620 and polarity in the developing cerebral cortex. *Development*. 137:4101–4110.  
621 doi:10.1242/dev.048637.
- 622 Yokota, Y., W.-Y. Kim, Y. Chen, X. Wang, A. Stanco, Y. Komuro, W. Snider, and E.S. Anton.  
623 2009. The adenomatous polyposis coli protein is an essential regulator of radial glial  
624 polarity and construction of the cerebral cortex. *Neuron*. 61:42–56.  
625 doi:10.1016/j.neuron.2008.10.053.
- 626



**Figure 1**

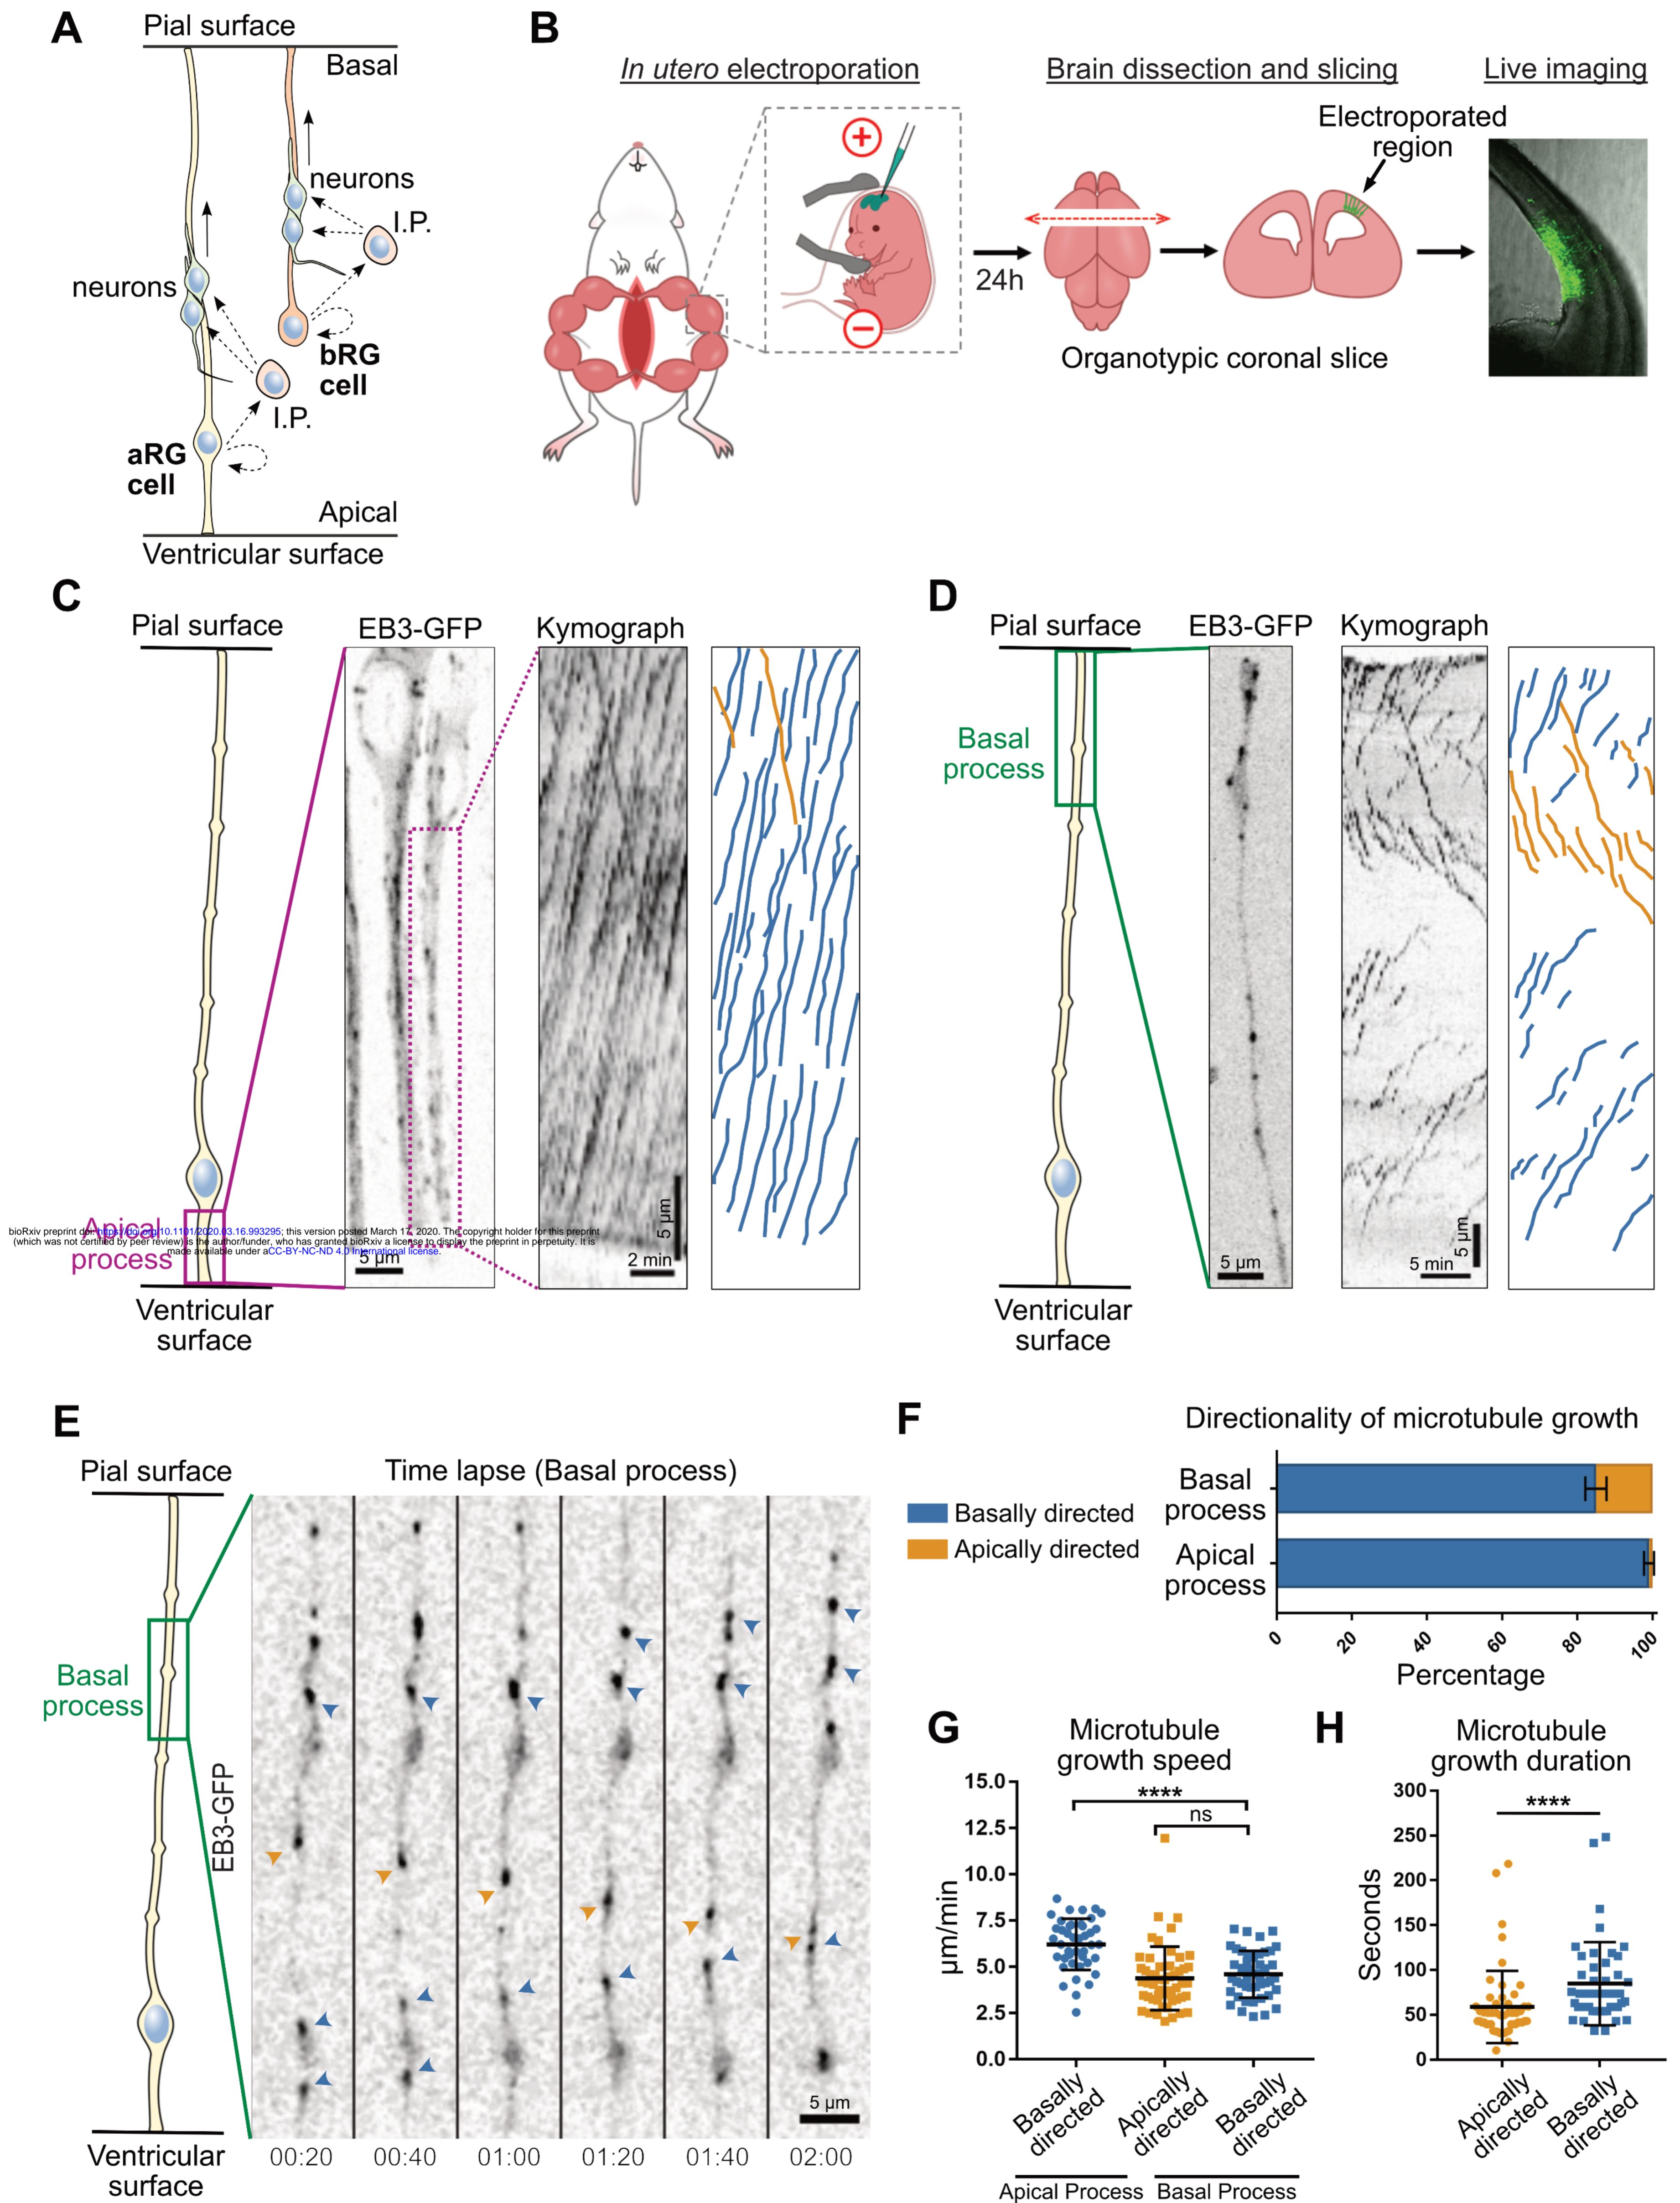



**Figure 2**

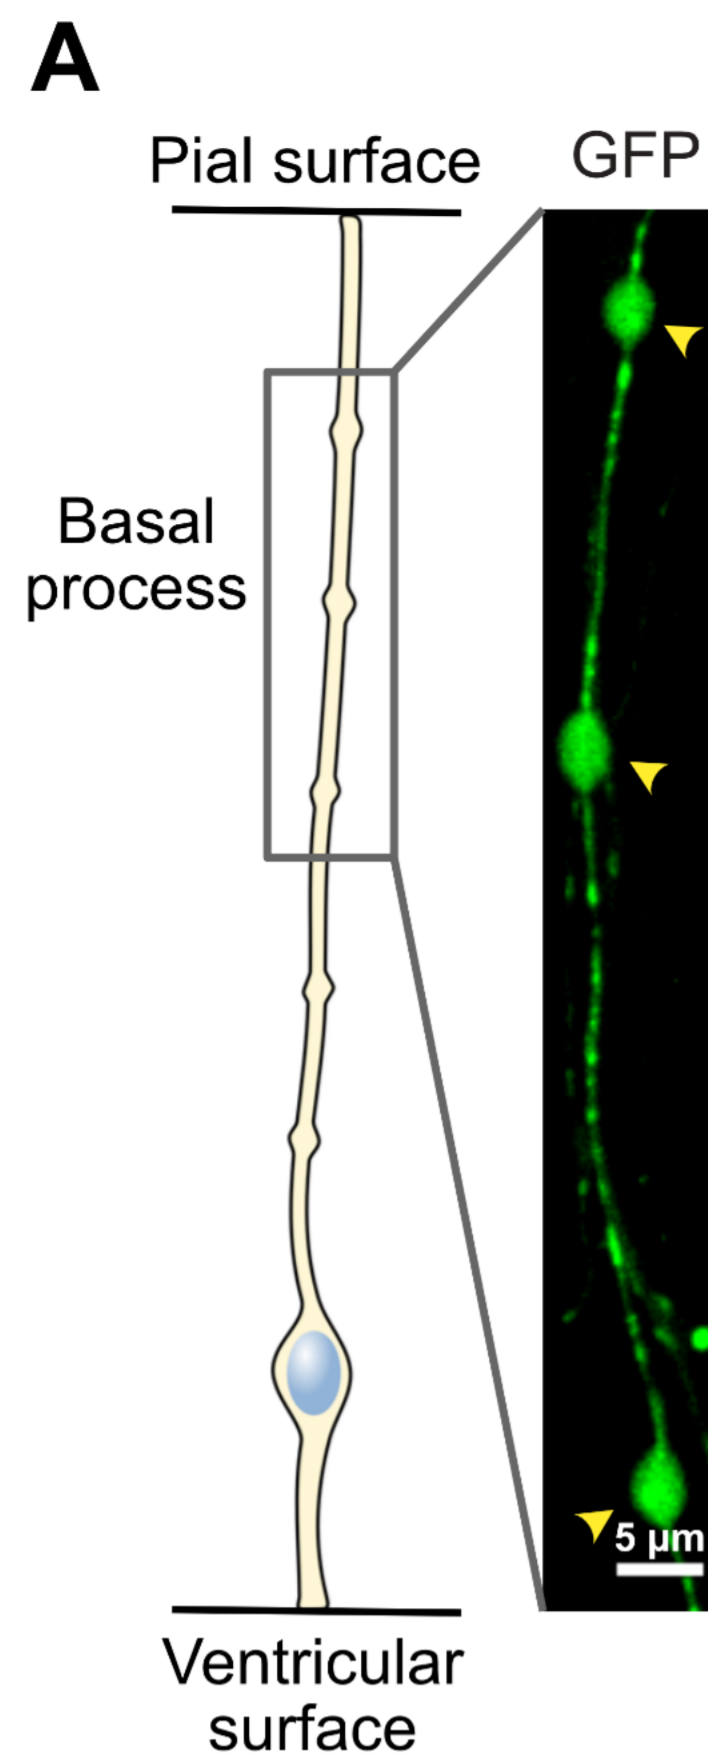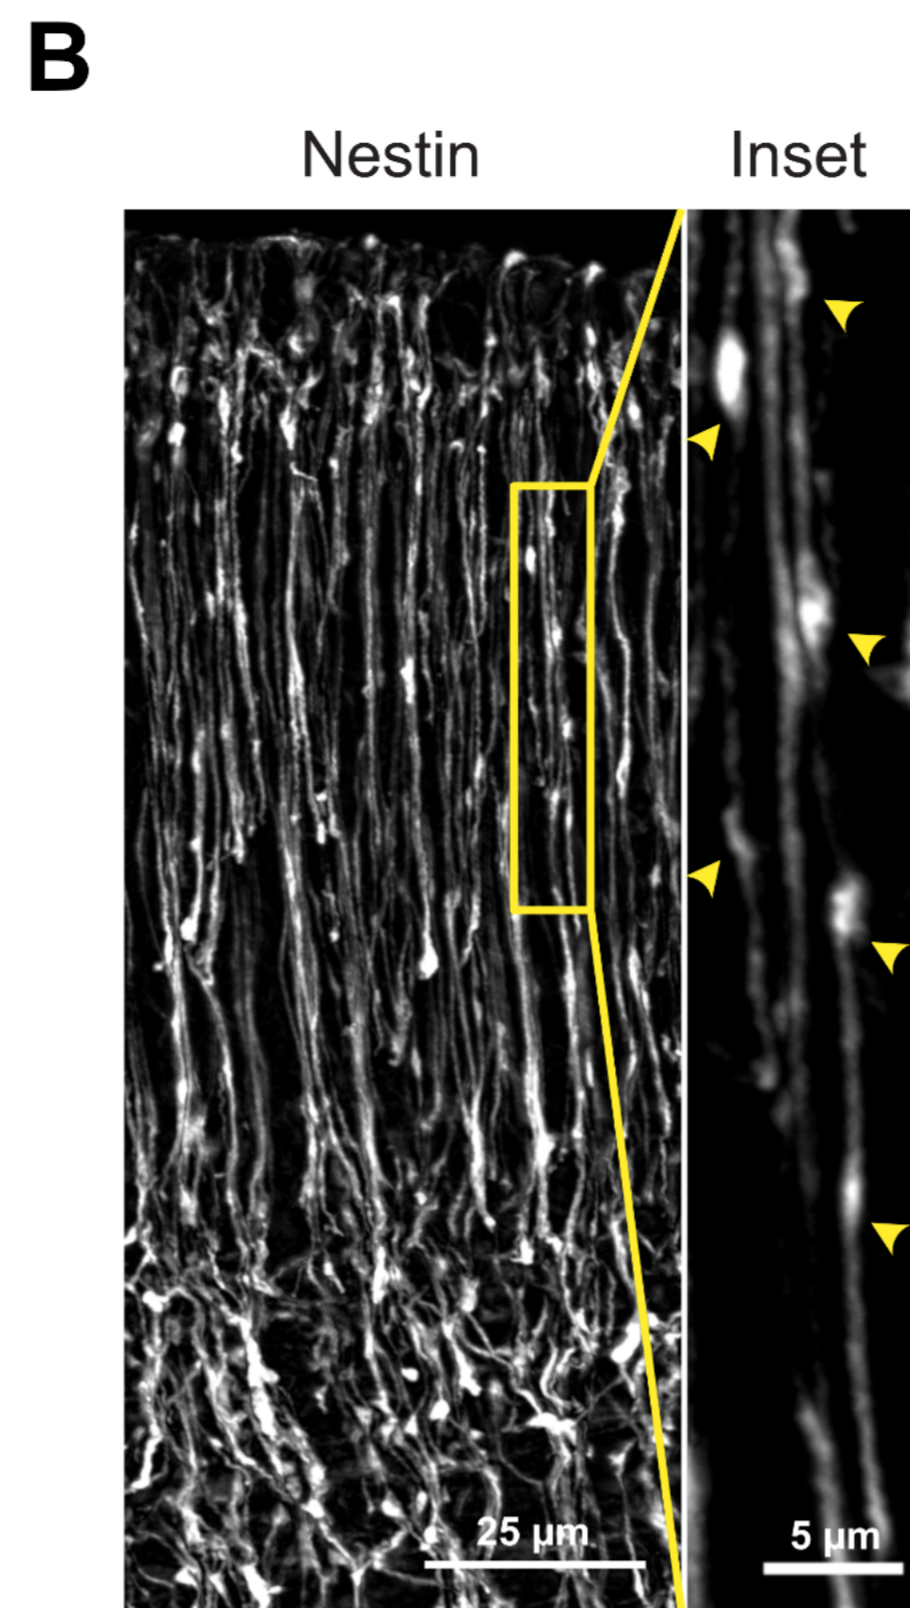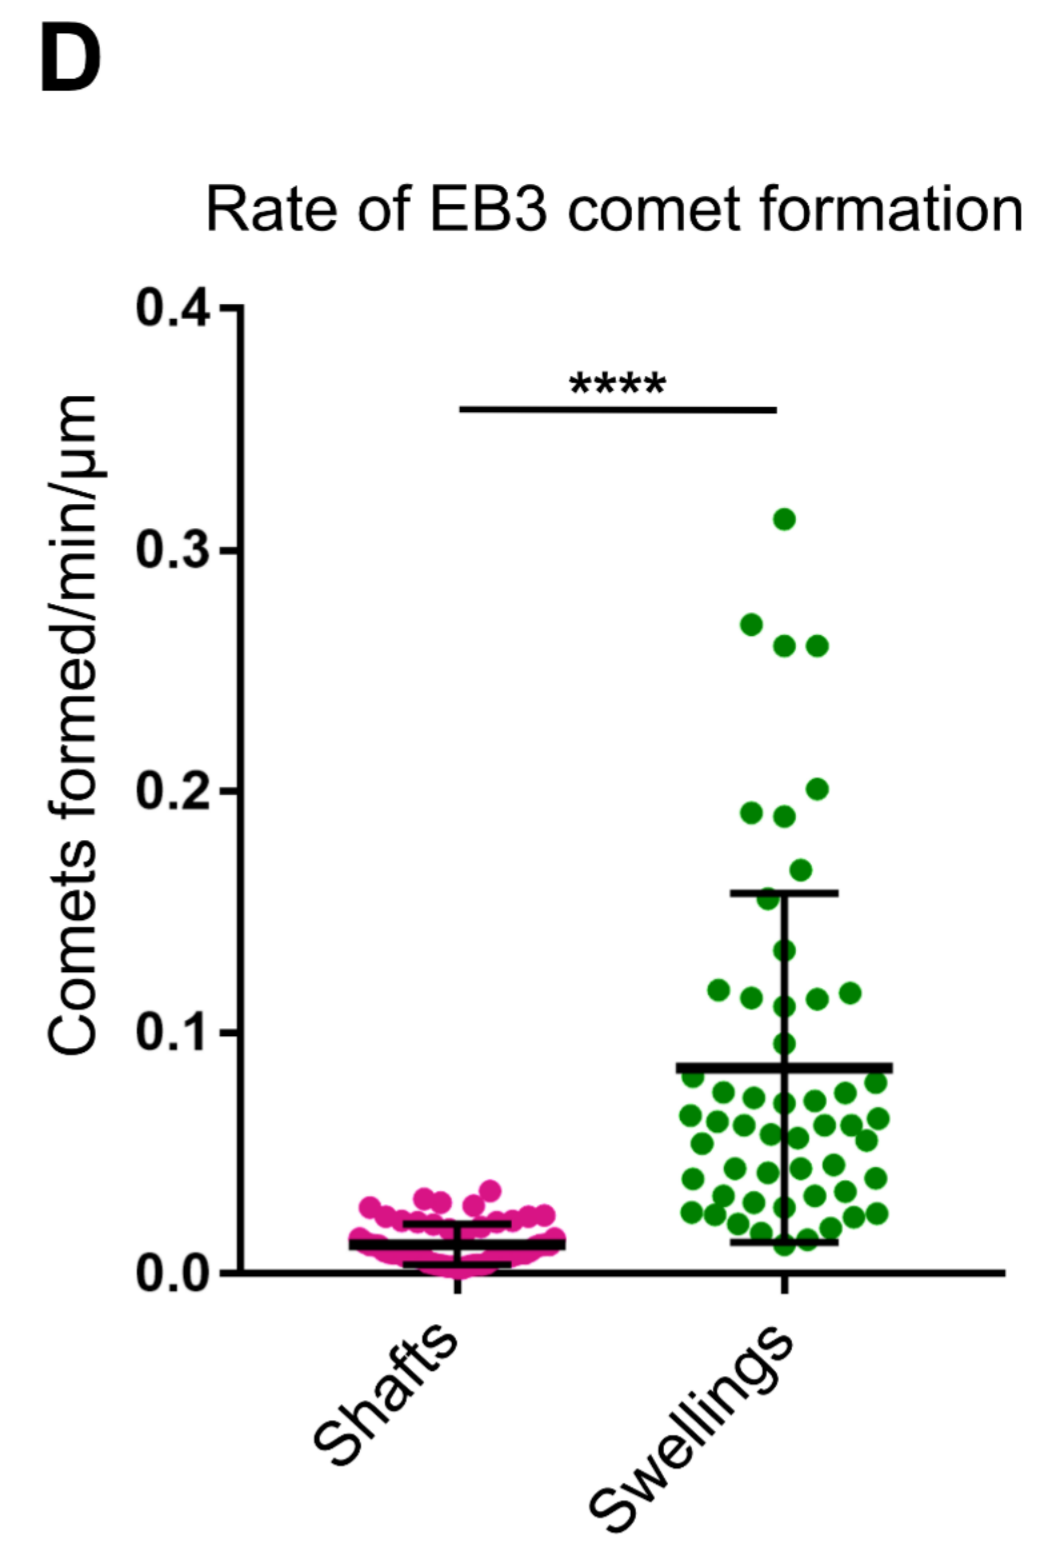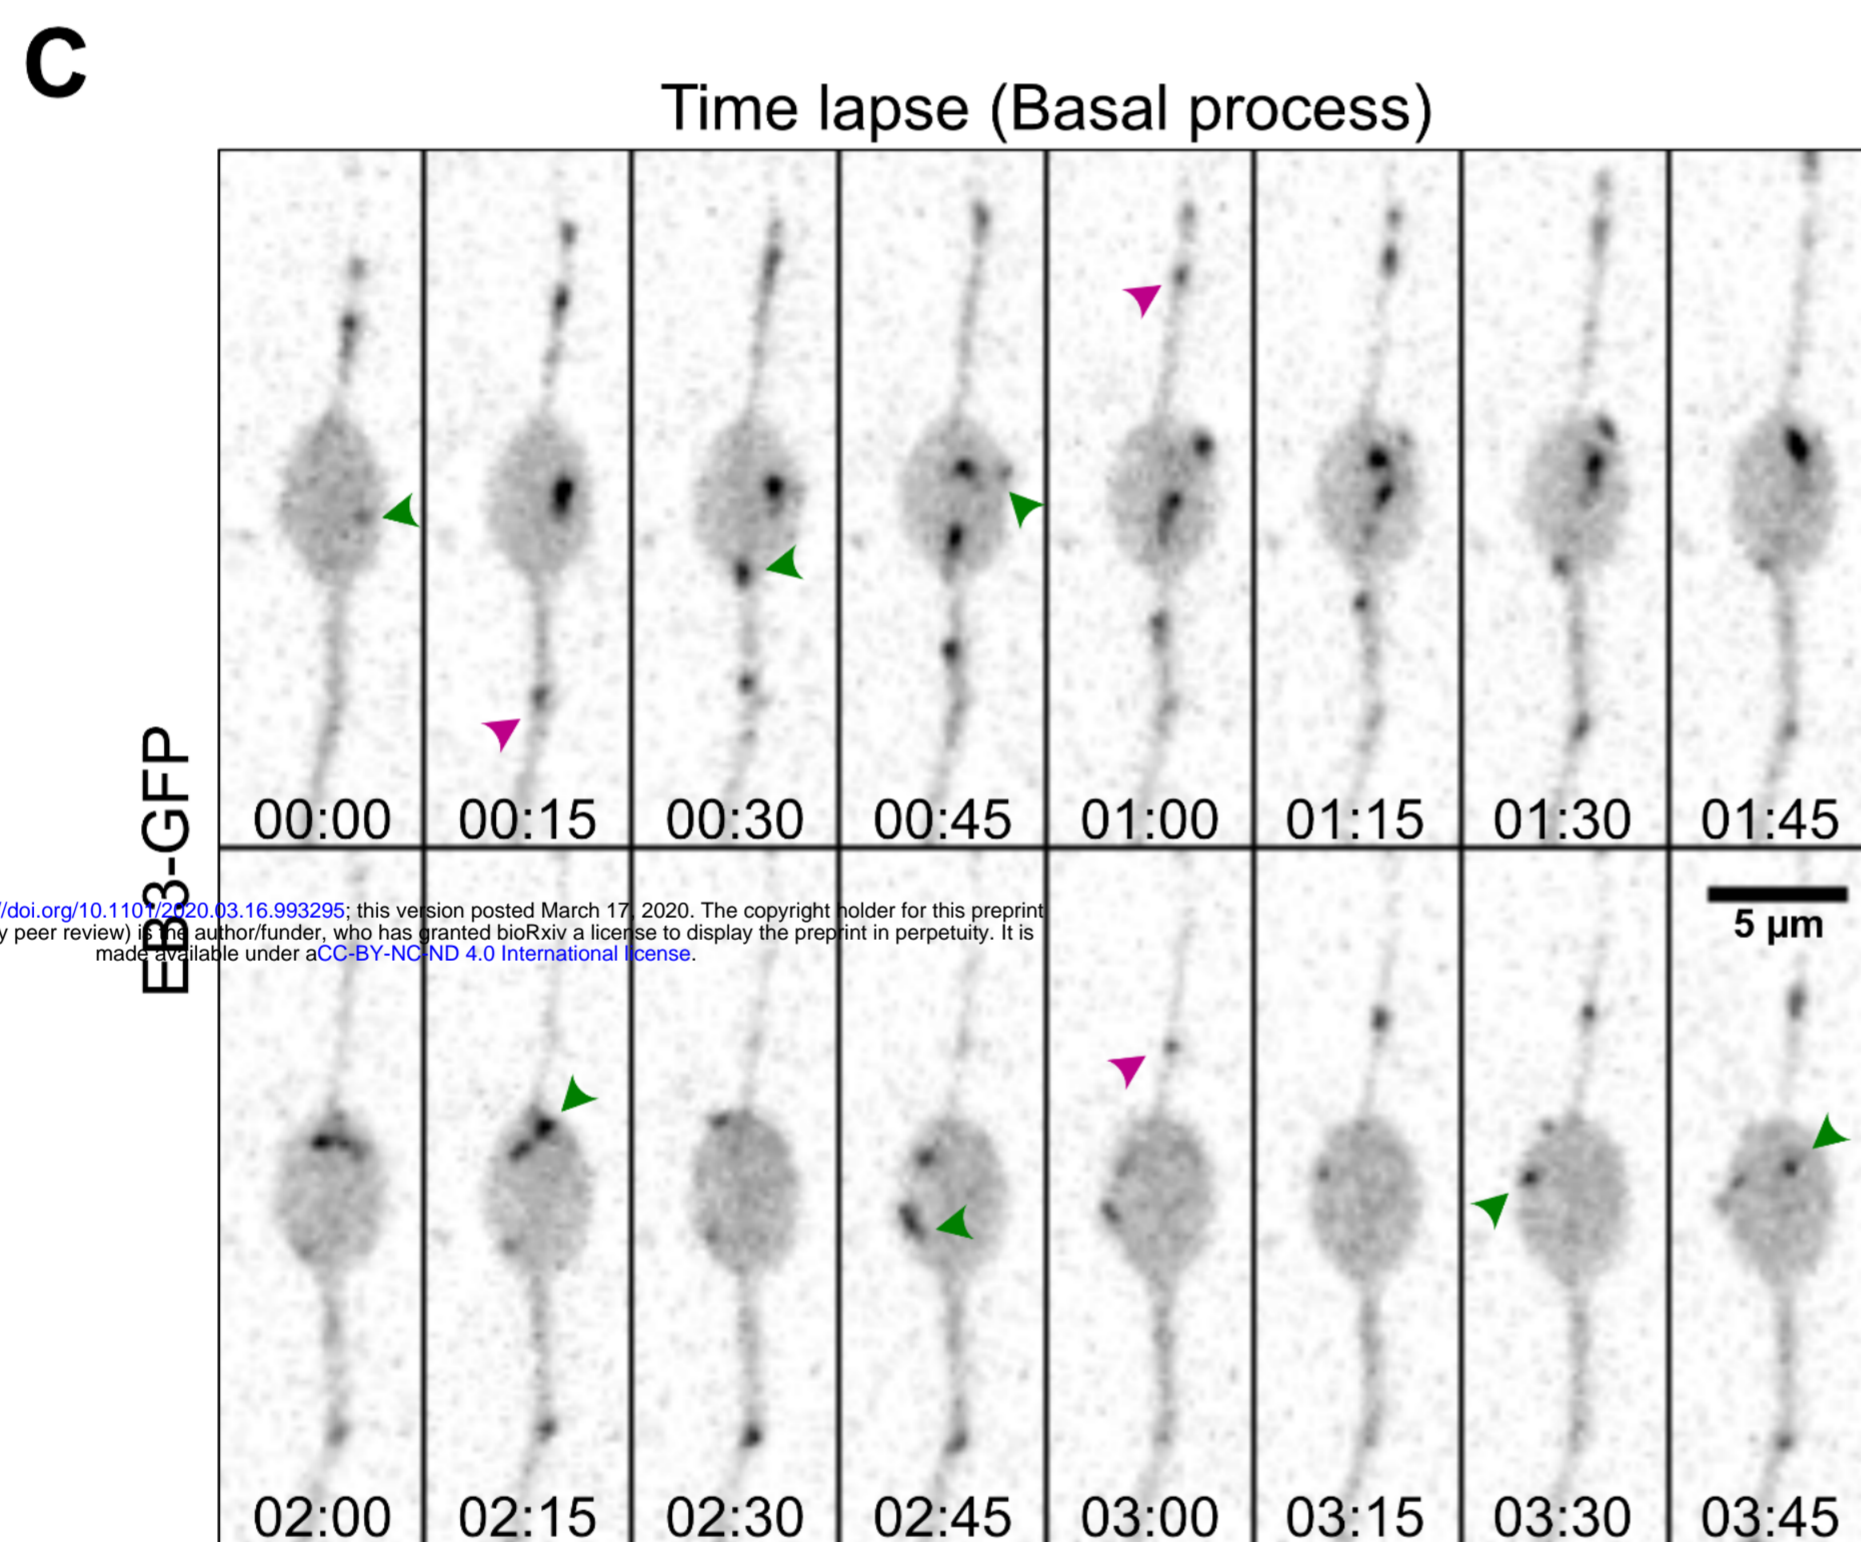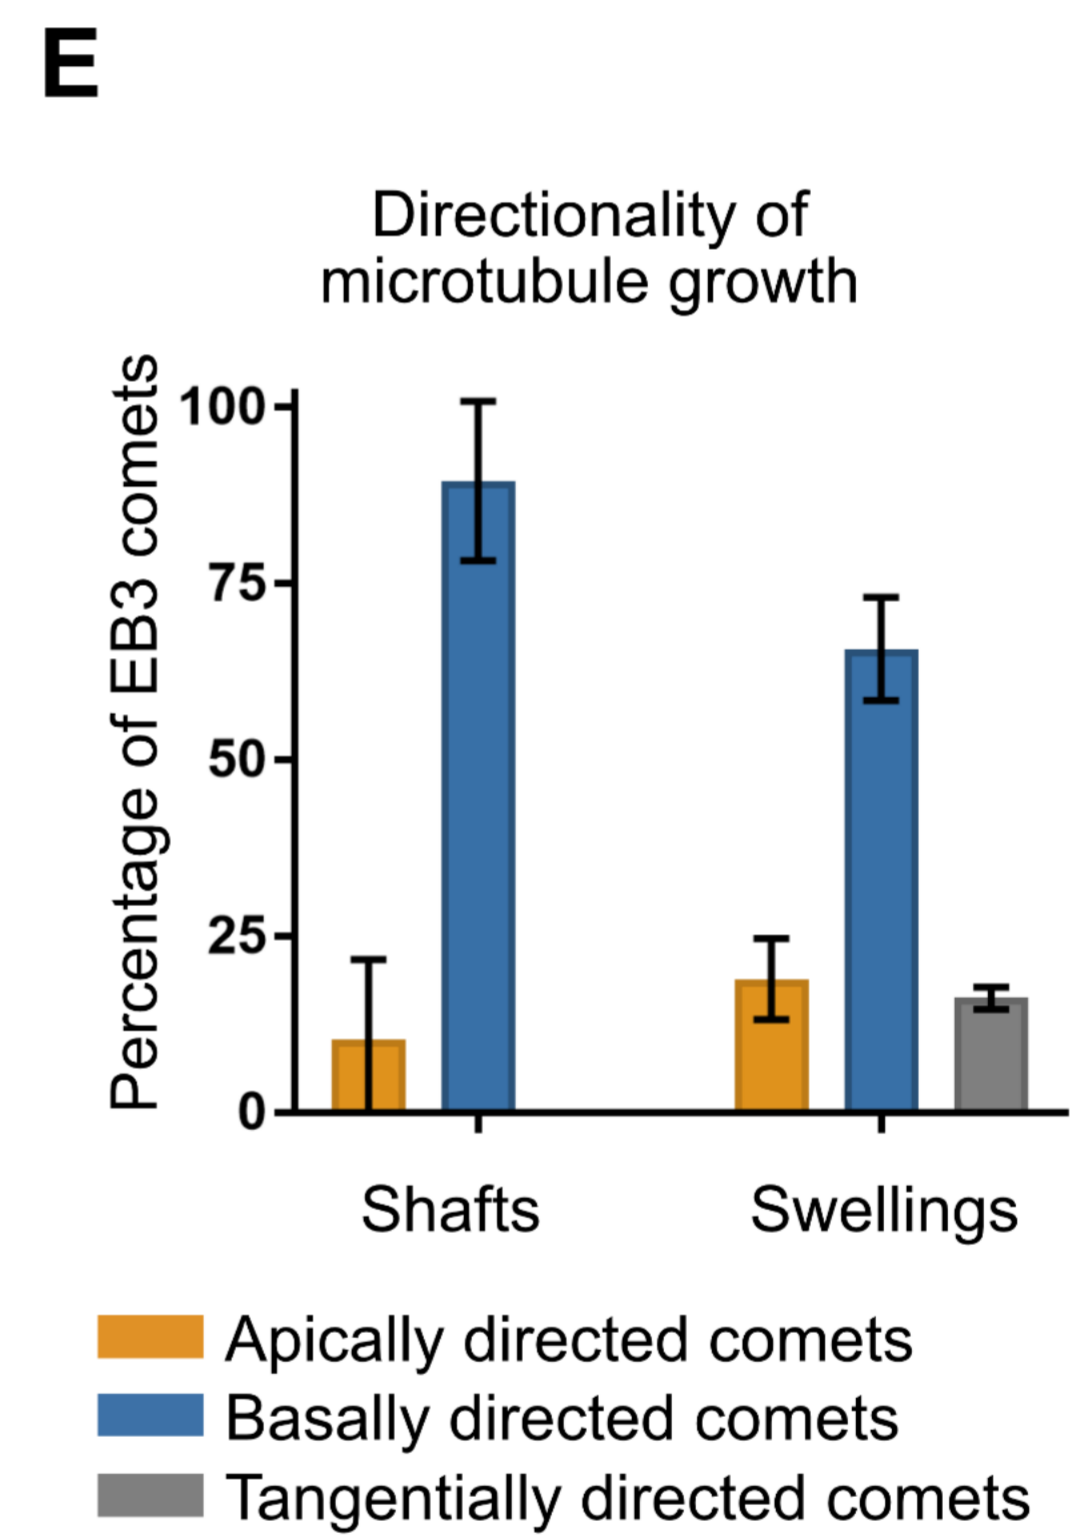



**Figure 3**

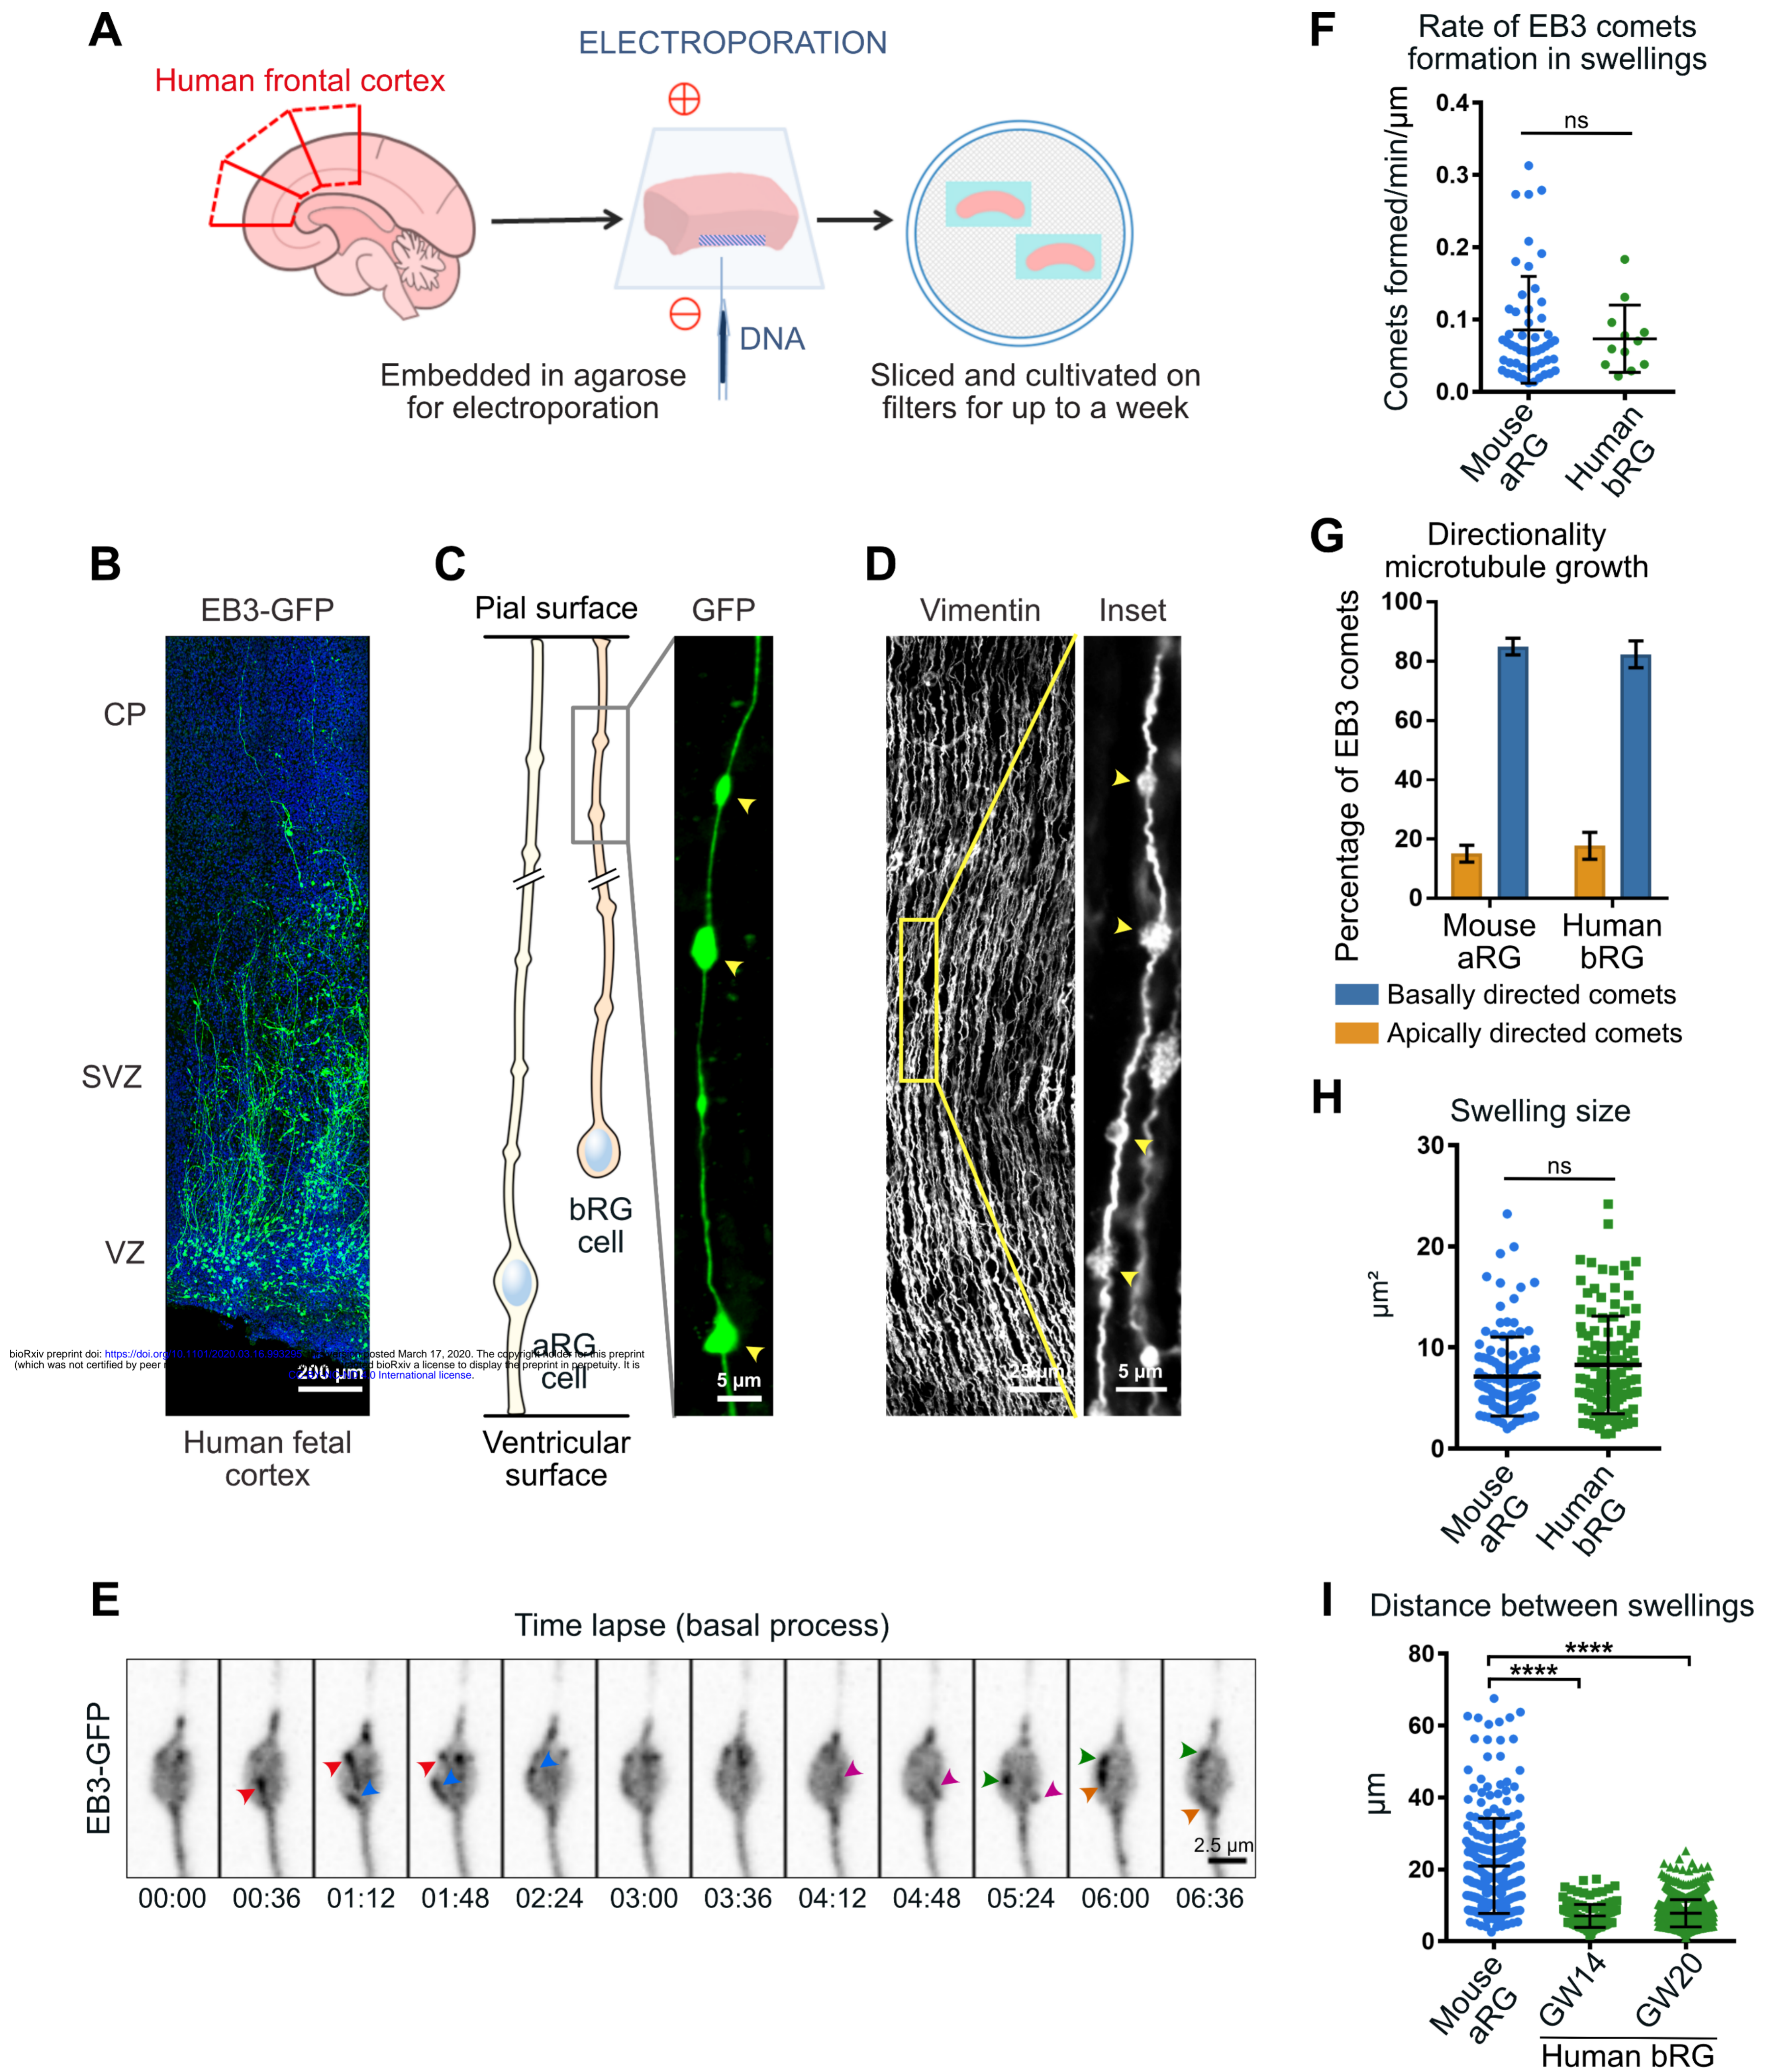







**Figure 5**

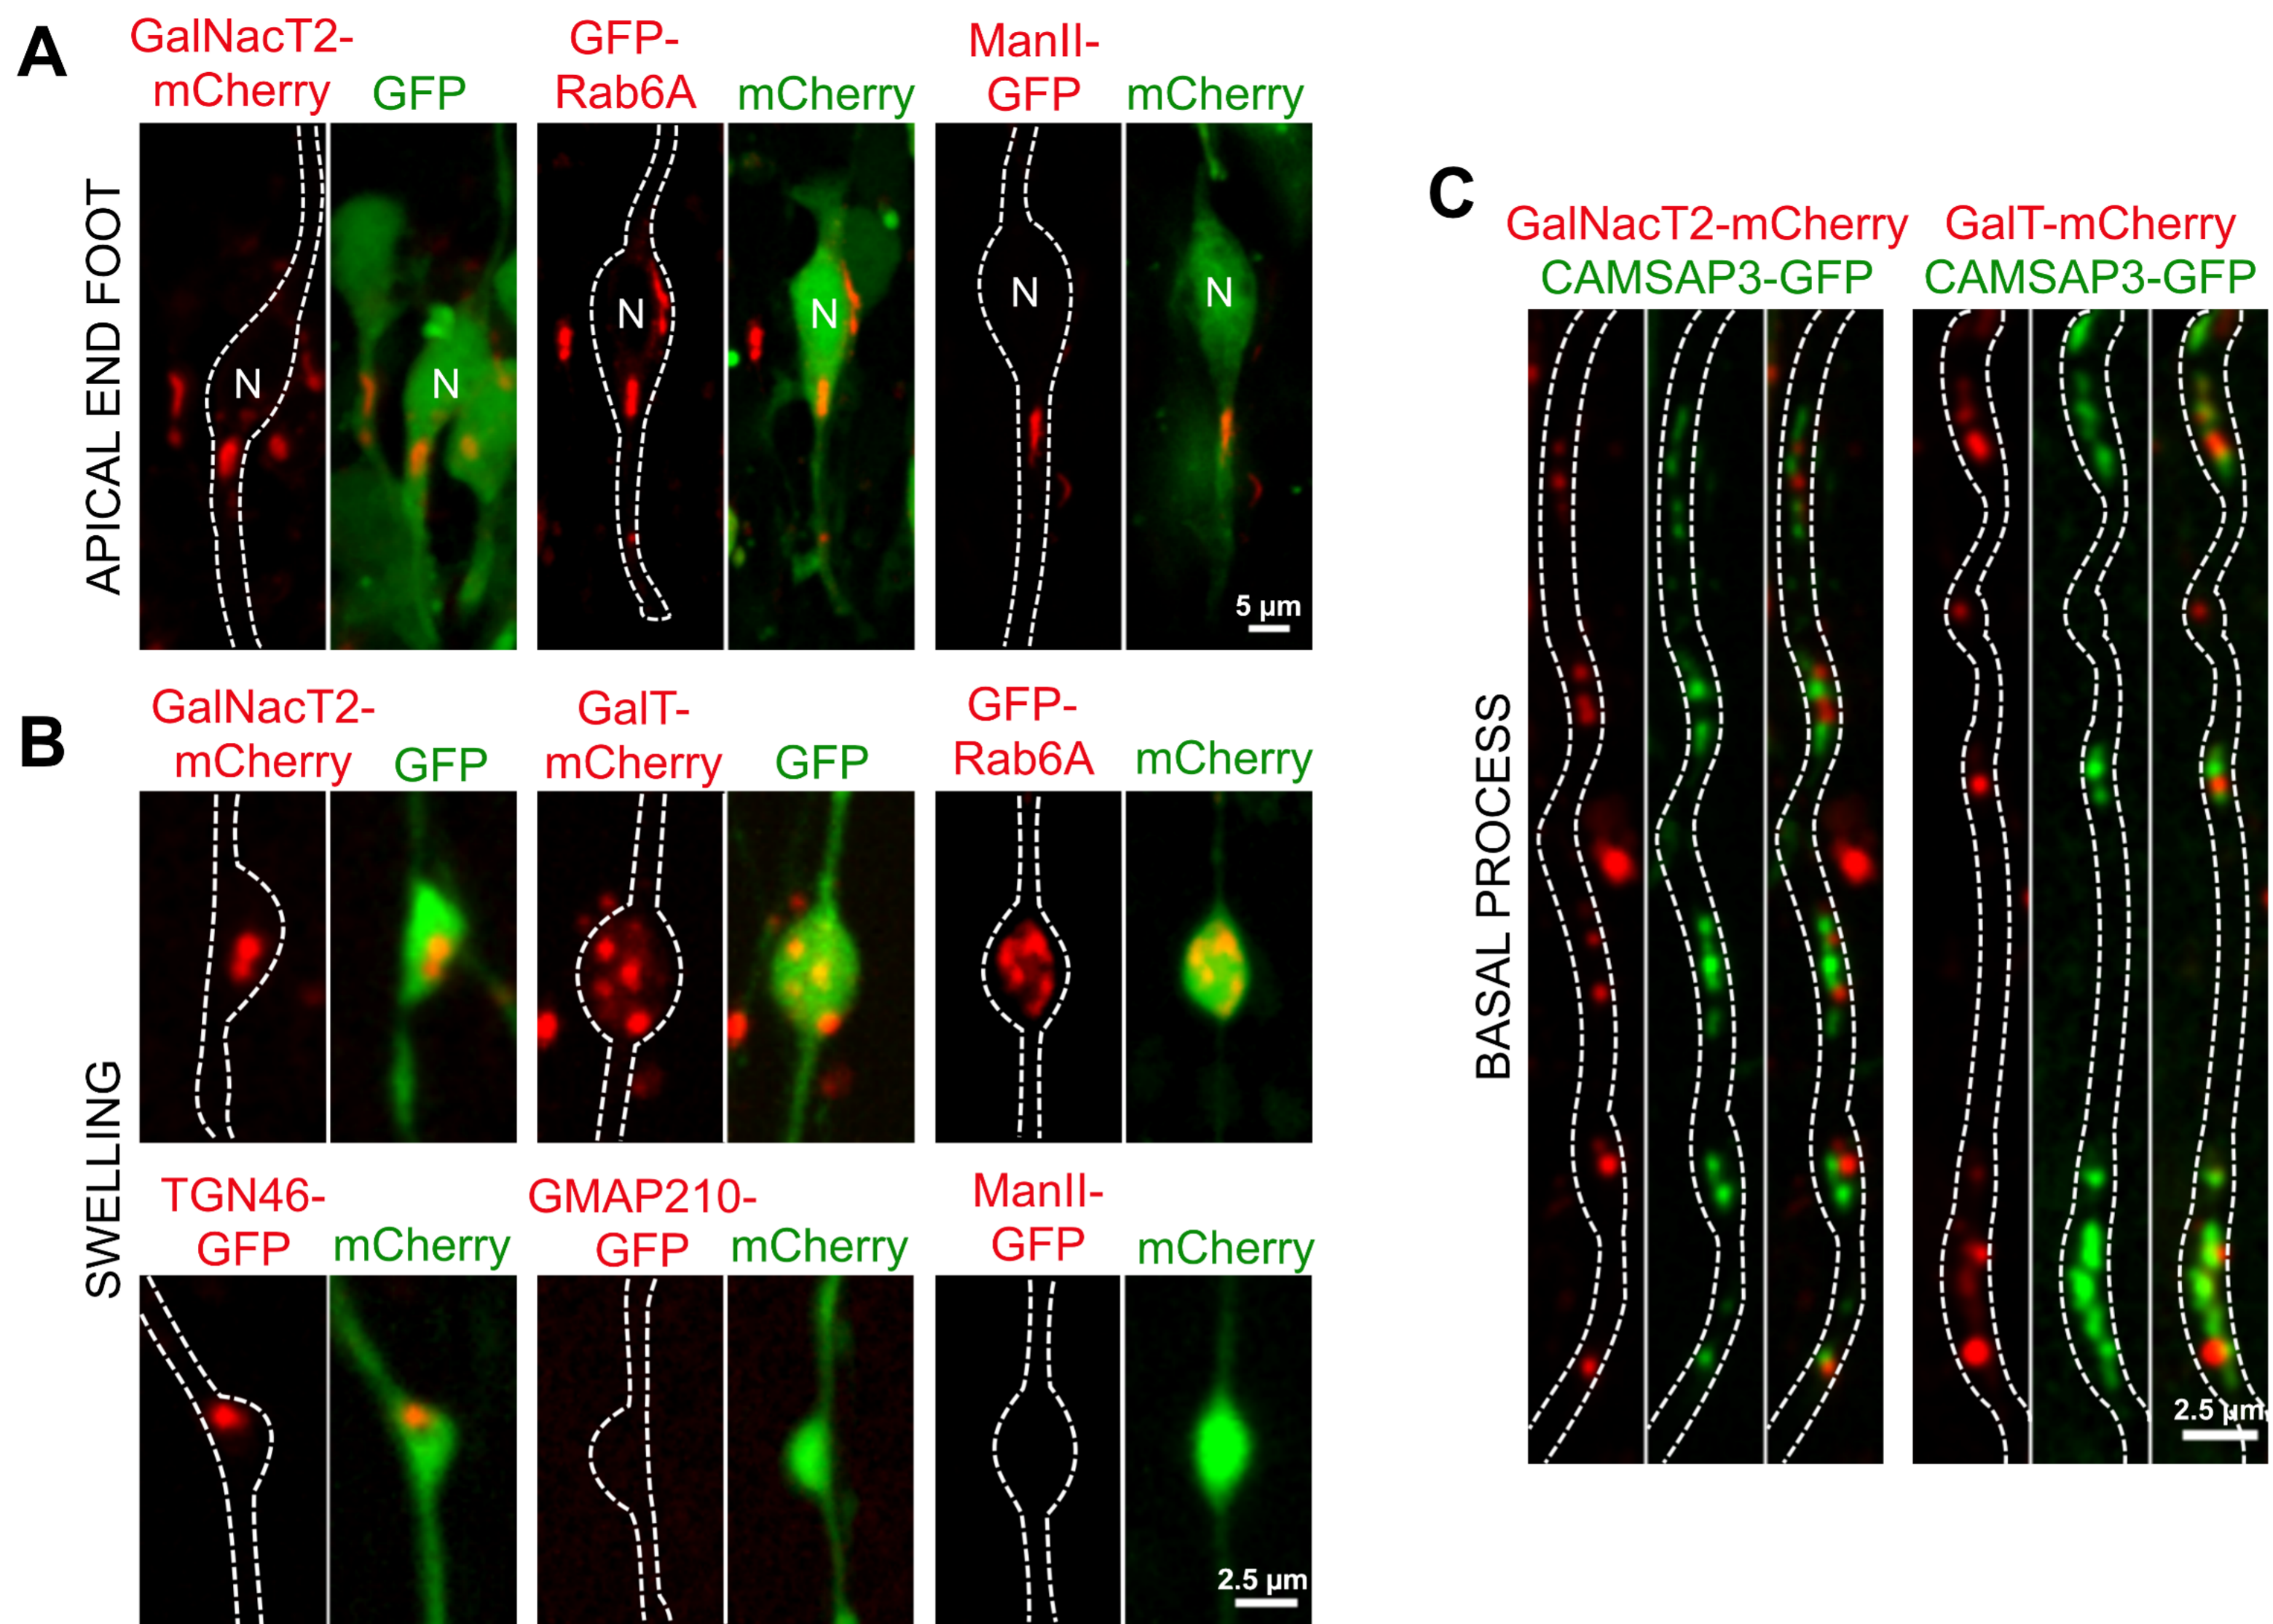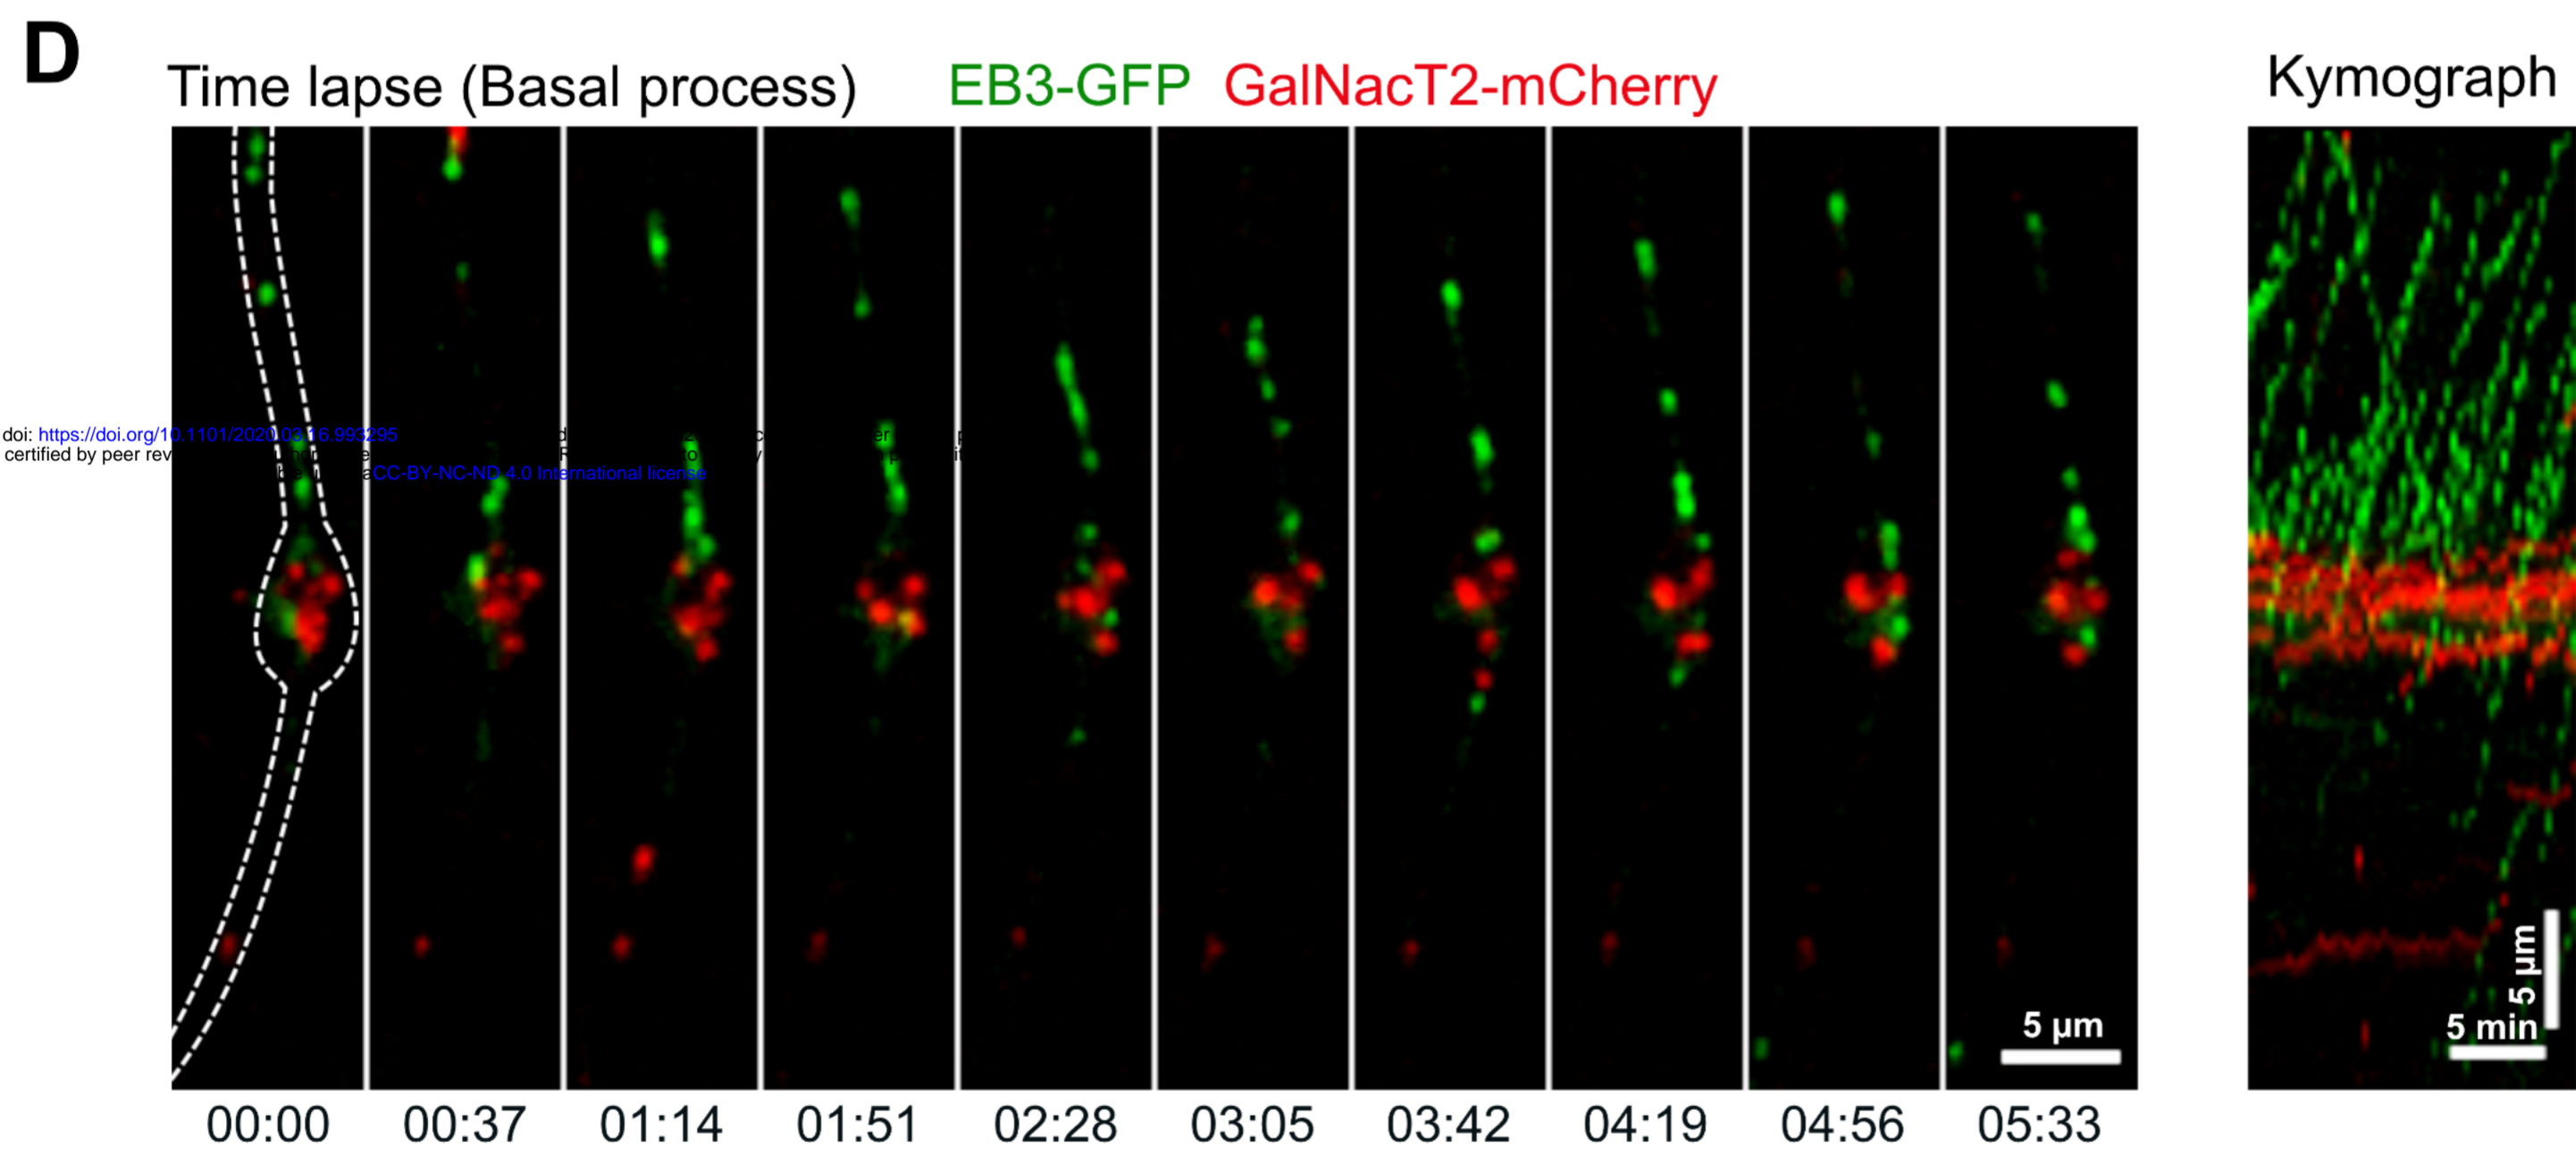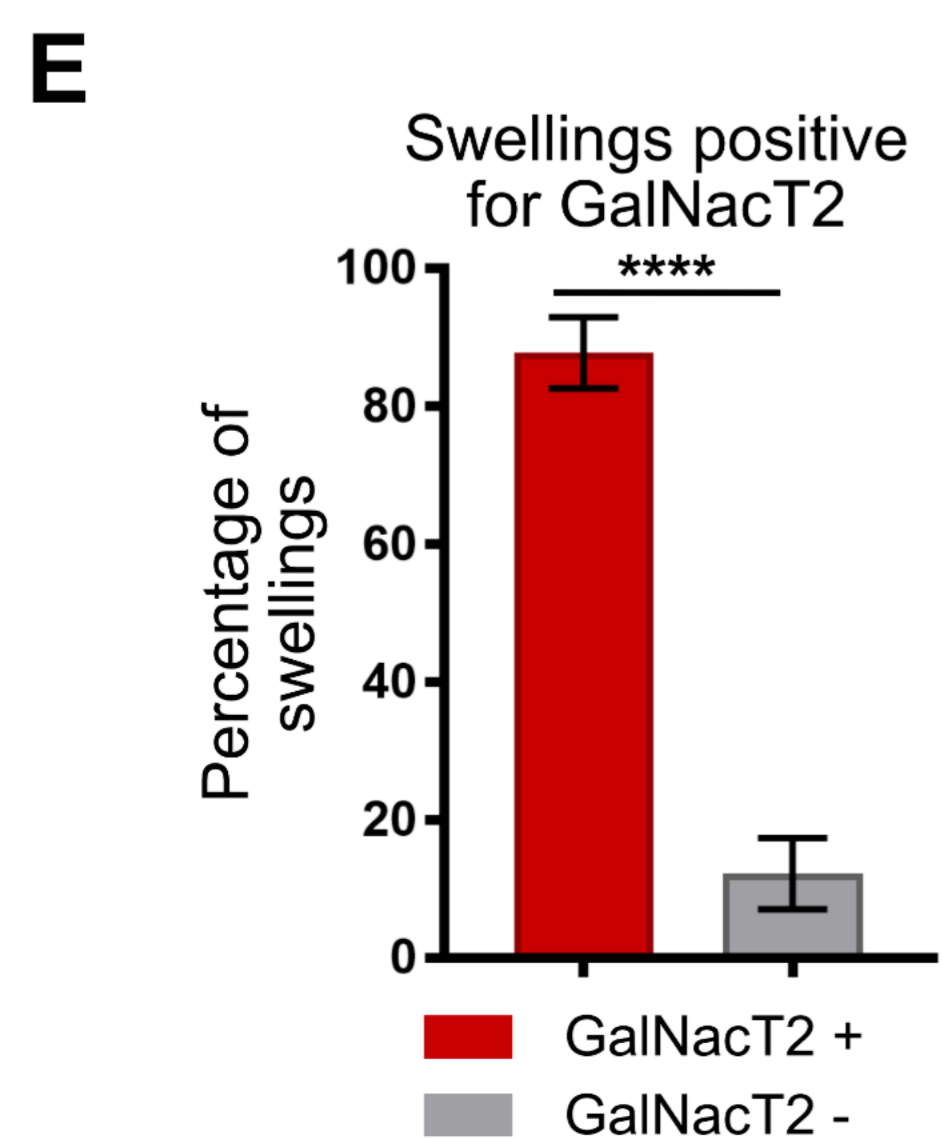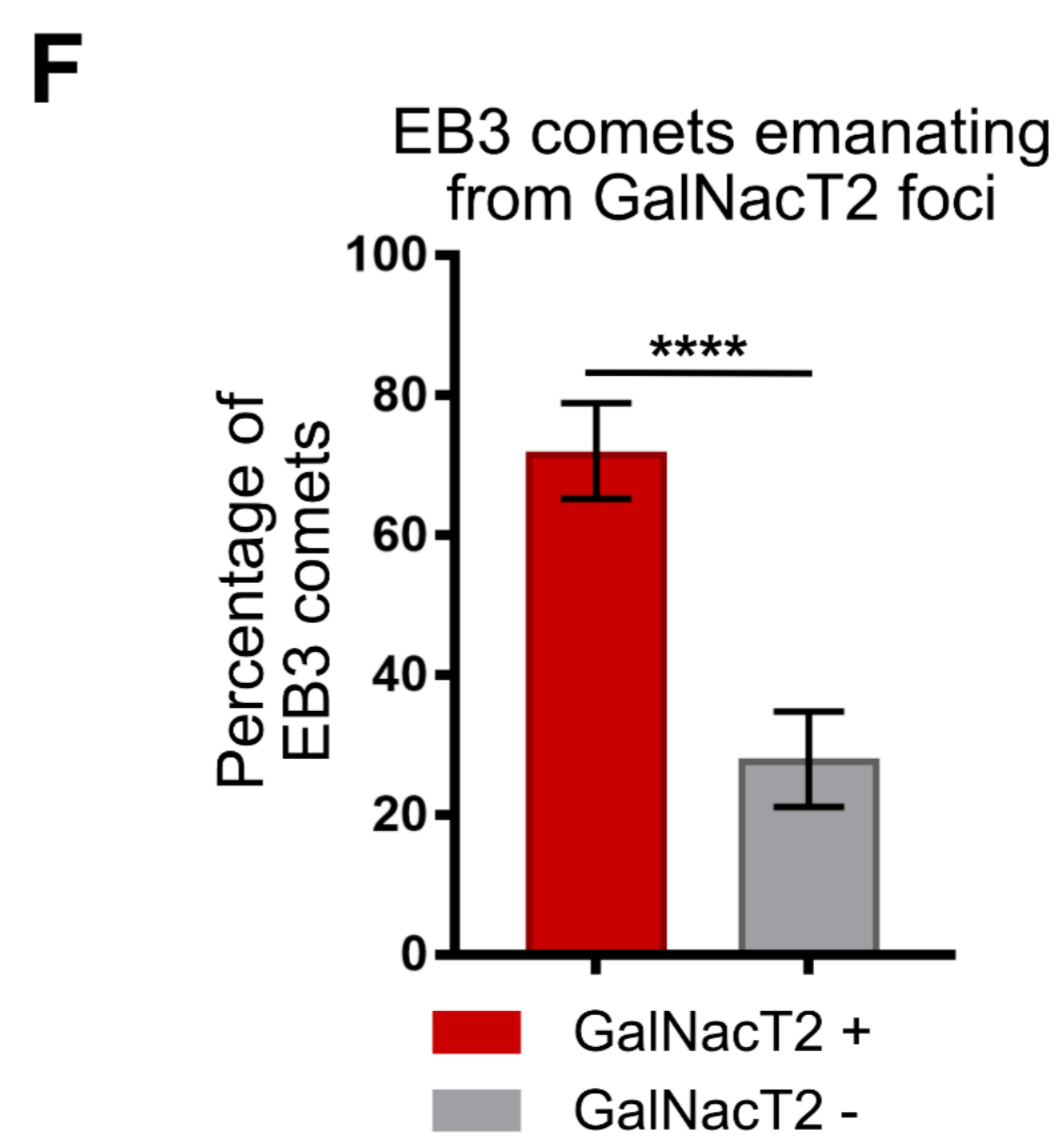

Source: https://www.biorxiv.org/content/10.1101/2020.03.16.993295v1.full.pdf
